# Supplementary material for: The association between daily physical activity and plasma B-type natriuretic peptide in patients with glucose intolerance: a cross-sectional study
Source: PubMed Central journal article supplement — BMJ Open. 2015 Jan 15;5(1):e006276. doi: 10.1136/bmjopen-2014-006276 (PMC4298105; doi:10.1136/bmjopen-2014-006276), 2015-01-15
Supplement: bmjopen-2014-006276.draft_revisions.pdf [file bmjopen-2014-006276.draft_revisions.pdf]

# BMJ Open

## A significant association of daily physical activity with plasma B-type natriuretic peptide in patients with glucose intolerance: a cross-sectional study in National Center for Global Health and Medicine

|                                 |                                                                                                                                                                                                                                                                                                                                                                                                                                            |
|---------------------------------|--------------------------------------------------------------------------------------------------------------------------------------------------------------------------------------------------------------------------------------------------------------------------------------------------------------------------------------------------------------------------------------------------------------------------------------------|
| Journal:                        | <i>BMJ Open</i>                                                                                                                                                                                                                                                                                                                                                                                                                            |
| Manuscript ID:                  | bmjopen-2014-006276                                                                                                                                                                                                                                                                                                                                                                                                                        |
| Article Type:                   | Research                                                                                                                                                                                                                                                                                                                                                                                                                                   |
| Date Submitted by the Author:   | 04-Aug-2014                                                                                                                                                                                                                                                                                                                                                                                                                                |
| Complete List of Authors:       | Hamasaki, Hidetaka; National Center for Global Health and Medicine Kohnodai Hospital, Department of Internal Medicine<br>Yanai, Hidekatsu; National Center for Global Health and Medicine Kohnodai Hospital, Department of Internal Medicine<br>Kakei, Masafumi; Jichi Medical University School of Medicine, Noda, Mitsuhiro; Center Hospital, National Center for Global Health and Medicine,<br>Ezaki, Osamu; Showa Women's University, |
| <b>Primary Subject Heading</b>: | Diabetes and endocrinology                                                                                                                                                                                                                                                                                                                                                                                                                 |
| Secondary Subject Heading:      | Diabetes and endocrinology                                                                                                                                                                                                                                                                                                                                                                                                                 |
| Keywords:                       | DIABETES & ENDOCRINOLOGY, SPORTS MEDICINE, PUBLIC HEALTH                                                                                                                                                                                                                                                                                                                                                                                   |
|                                 |                                                                                                                                                                                                                                                                                                                                                                                                                                            |

SCHOLARONE™  
Manuscripts

Only

**Research****A significant association of daily physical activity with plasma B-type natriuretic peptide in patients with glucose intolerance: a cross-sectional study in National Center for Global Health and Medicine**

Hidetaka Hamasaki,<sup>1,2</sup> Hidekatsu Yanai,<sup>1</sup> Masafumi Kakei,<sup>2</sup> Mitsuhiro Noda,<sup>3</sup> Osamu Ezaki<sup>4</sup>

<sup>1</sup> Department of Internal Medicine, National Center for Global Health and Medicine Kohnodai Hospital, Chiba, Japan.

<sup>2</sup> Division of Complementary Medicine, First Department of General Medicine, Saitama Medical Center, Jichi Medical University School of Medicine, Saitama, Japan.

<sup>3</sup> Department of Diabetes and Metabolic Medicine, Center Hospital, National Center for Global Health and Medicine, Tokyo, Japan.

<sup>4</sup> Department of Human Health and Design, Faculty of Human Life and Environmental Sciences, Showa Women's University, Tokyo, Japan.

**Correspondence to**

Hidekatsu Yanai, MD, PhD, FACP, Department of Internal Medicine, National Center for Global Health and Medicine Kohnodai Hospital, 1-7-1 Kohnodai, Chiba 272-8516, Japan. E-mail: [dyanai@hospk.ncgm.go.jp](mailto:dyanai@hospk.ncgm.go.jp); Telephone: +81-47-372-3501; Fax: +81-47-372-1858

**Keywords:** B-type natriuretic peptide; glucose intolerance; insulin resistance; physical activity; type 2 diabetes

**Word count:** 2,237 words

**ABSTRACT**

**Objectives:** In spite of accumulating evidences suggesting an inverse association between insulin resistance and plasma B-type natriuretic peptide (BNP) levels, the effect of daily physical activity on plasma BNP in individuals with glucose intolerance remains unknown. We investigated the association of physical activity level (PAL) with plasma BNP in patients with impaired fasting glucose, impaired glucose tolerance and type 2 diabetes.

**Design:** Cross-sectional study.

**Setting:** Outpatients visiting National Center for Global Health and Medicine Kohnodai Hospital.

**Participants:** A total of 60 patients with glucose intolerance who did not take any hypoglycemic agents, cholesterol lowering agents and antihypertensive agents were recruited. Patients who were diagnosed as having heart failure and renal impairment, engaged in sports-like exercise and resistance training were excluded.

**Primary outcome measures:** PAL was objectively measured by a triaxial accelerometer. The association between PAL and plasma BNP was assessed by multiple regression analysis.

**Results:** PAL was positively correlated with plasma BNP levels ( $r=0.328$ ,  $p=0.011$ ).

1  
2  
3  
4  
5  
6 PAL was still significantly correlated with plasma BNP levels after adjustment for age  
7  
8  
9 ( $\beta=0.320$ ,  $p=0.016$ ), and adjustment for age and BMI ( $\beta=0.312$ ,  $p=0.019$ ). Plasma BNP  
10  
11  
12 levels were inversely correlated with serum insulin levels ( $r=-0.287$ ,  $p=0.026$ ) and  
13  
14 homeostasis model assessment-estimated insulin resistance (HOMA-IR) ( $r=-0.294$ ,  
15  
16  $p=0.023$ ). Serum insulin levels (mean  $\pm$  SD,  $8.1 \pm 6.4$   $\mu\text{U/ml}$ ) and HOMA-IR ( $2.4 \pm$   
17  
18  $1.9$ ) in high-BNP group were significantly lower than those ( $11.2 \pm 7.4$   $\mu\text{U/ml}$  and  $3.7 \pm$   
19  
20  $3.0$ , respectively) in low-BNP group.  
21  
22  
23  
24

25  
26 **Conclusions:** Our findings propose the possibility that plasma BNP may be increased  
27  
28  
29 by daily physical activity and BNP is beneficially associated with insulin resistance.  
30  
31  
32  
33  
34  
35  
36  
37  
38  
39  
40  
41  
42  
43  
44  
45  
46  
47  
48  
49  
50  
51  
52  
53  
54  
55  
56  
57  
58  
59  
60

### Strengths and limitations of this study

- This study provides novel data: objectively measured light-intensity daily physical activity using a triaxial accelerometer is positively associated with plasma BNP levels in patients with glucose intolerance.
- Our study evaluated precisely an association between daily physical activity and plasma BNP levels, by recruiting drug-naive patients who were not engaged in sports-like exercise.
- Previous studies reported an inverse association between plasma BNP levels and the markers for insulin resistance in healthy subjects. To our knowledge, our study is the first to show a beneficial association between plasma BNP levels and insulin resistance in patients with glucose intolerance.
- The limitations are the small sample size and the cross-sectional design which does not allow us to establish any causal relationship.
- Even a triaxial accelerometer may lead to under or overestimation of energy expenditure. It can be denied that energy expenditure assessed by a triaxial accelerometer differ from the true amounts.

## INTRODUCTION

B-type natriuretic peptide (BNP) belongs to the cardiac natriuretic peptide family which are released from the heart in response to pressure and volume overload.<sup>1</sup> Plasma BNP and N-terminal proBNP (Nt-proBNP) are increased with the severity of left ventricular dysfunction and/or hypertrophy, therefore, it has become a useful biomarker for diagnosis and prognosis of heart failure with or without type 2 diabetes.<sup>2-7</sup>

Plasma BNP levels have been reported to be inversely related to body mass index (BMI) and waist circumference in individuals without heart failure.<sup>8-9</sup> Very recently, Olsen MH, et al. reported that Nt-proBNP was significantly lower in individuals with the metabolic syndrome as compared with those without the metabolic syndrome.<sup>10</sup> In their study, Nt-proBNP levels were inversely correlated with BMI, waist circumference, serum cholesterol and triglyceride, plasma glucose and insulin, independently of age and gender.<sup>10</sup> These results suggest that BNP is beneficially associated with obesity and obesity-related metabolic disorders.

Low physical activity and sedentary lifestyle induce the development of type 2 diabetes, and also deteriorate glucose control in patients with type 2 diabetes.<sup>11-12</sup> Exercise such as bicycle and hand-grip exercise has been reported to acutely increase plasma BNP levels with exercise intensity, in healthy individuals.<sup>13-14</sup> However, the

1  
2  
3  
4  
5  
6 effect of daily physical activity on plasma BNP levels remain obscure. To our  
7  
8  
9 knowledge, there were no previous studies that investigated the association between  
10  
11  
12 daily physical activity and plasma BNP levels in patients with glucose intolerance.  
13

14  
15 Here, we studied the association of physical activity level (PAL) which was  
16  
17  
18 evaluated objectively by using a triaxial accelerometer, with plasma BNP levels, in  
19  
20  
21 patients with impaired fasting glucose (IFG), impaired glucose tolerance (IGT) and type  
22  
23  
24 2 diabetes. Furthermore, we elucidated the correlations of plasma BNP levels to  
25  
26  
27 metabolic parameters in patients with such glucose intolerance.  
28  
29  
30  
31

## 32 **MATERIAL AND METHODS**

### 33 34 35 **Study protocol and participants**

36  
37  
38 The study protocol was approved by the Medical Ethics Committee of National Center  
39  
40  
41 for Global Health and Medicine (reference number NCGM-G-001212-00). We studied  
42  
43  
44 60 participants (28 men and 32 women) who did not take any hypoglycemic agents,  
45  
46  
47 cholesterol lowering agents and antihypertensive agents. To understand the effects of  
48  
49  
50 daily physical activity such as non-exercise activity thermogenesis (NEAT)<sup>15</sup> on BNP  
51  
52  
53 and metabolic parameters, participants who were engaged in sports-like exercise and  
54  
55  
56 resistance training were excluded. Participants with heart failure and renal impairment  
57  
58  
59  
60



1  
2  
3  
4  
5  
6 were also excluded. The participants were diagnosed as having type 2 diabetes  
7  
8  
9 according to diagnostic criteria set to serum levels of hemoglobin A1c (HbA1c)  $\geq$   
10  
11  
12 6.5 %, fasting plasma glucose (FPG)  $\geq$  126 mg/dl, casual plasma glucose  $\geq$  200  
13  
14 mg/dl and 2-h values in the 75 g oral glucose tolerance test (OGTT)  $\geq$  200 mg/dl.<sup>16</sup>  
15  
16  
17 The participants were defined as having IFG and IGT according to FPG levels 110  
18  
19 mg/dl to 125 mg/dl, or 2-h values in the OGTT of 140 mg/dl to 199 mg/dl.<sup>16</sup>  
20  
21  
22  
23  
24  
25

### 26 **Anthropometric and physiological measurements**

27  
28  
29 Height and weight were measured using a rigid stadiometer and scales (DP-7100PW,  
30  
31 Yamato Co., Ltd, Hyogo, Japan). Waist circumference around the navel was measured  
32  
33 with a metal anthropometric tape while participants are standing and breathing out. BMI  
34  
35 was calculated as the body weight in kilograms divided by the height in meters squared.  
36  
37  
38 Blood pressure was measured with participants in a seated position using an automatic  
39  
40 sphygmomanometer (HEM-762, Omron Co., Ltd, Kyoto, Japan).  
41  
42  
43  
44  
45  
46  
47  
48

### 49 **Physical activity measurement**

50  
51  
52 Daily physical activity was measured using a triaxial accelerometer (Active Style Pro  
53  
54 HJA-350IT, Omron Co., Ltd, Kyoto, Japan), 74 x 46 x 34 mm and 60 g including  
55  
56  
57  
58  
59  
60

1  
2  
3  
4  
5  
6 batteries. Participants studied wore the accelerometer on the left side of the waist.  
7  
8  
9 Anteroposterior, mediolateral and vertical acceleration measurements were obtained  
10  
11 during each physical activity at a rate of 32 Hz to 12-bit accuracy. Each of three signals  
12  
13 from the triaxial accelerometer was passed through a high-pass filter with a cut-off  
14  
15 frequency of 0.7 Hz to remove the gravitational acceleration component. The ratios of  
16  
17 unfiltered to filtered total acceleration (TAU/TAF) and filtered vertical and horizontal  
18  
19 acceleration (VAF/HAF) were calculated to determine the cut-off value for the  
20  
21 classification of locomotive activities and non-locomotive activities including such as  
22  
23 household and occupational activities, which resulted in almost 100% accurate  
24  
25 demarcation for daily eleven different activities.<sup>17</sup> Furthermore, metabolic equivalent  
26  
27 values (METs) determined by this triaxial accelerometer have been reported to be  
28  
29 closely correlated with METs calculated by using energy expenditure (EE) measured by  
30  
31 indirect calorimetry.<sup>17 18</sup>  
32  
33  
34  
35  
36  
37  
38  
39  
40  
41  
42  
43

44 Participants studied wore the accelerometer on the left side of the waist for  
45  
46 consecutive 7 days, and physical activities were recorded. Participants were requested to  
47  
48 wear the accelerometer except under special circumstances such as sleeping, bathing  
49  
50 and during aquatic activities. Activity data were stored on a minute-by-minute basis and  
51  
52 were downloaded to a personal computer before analysis. We excluded days in which  
53  
54  
55  
56  
57  
58  
59  
60

1  
2  
3  
4  
5  
6 participants did not wear the accelerometer for more than 8 hours from the data for  
7  
8  
9 analysis.

10  
11 Basal metabolic rate (BMR) was estimated from multiple regression equation  
12 including age, sex, height and ideal body weight (IBW) as variables, the equation as  
13 follows:  $BMR \text{ (kcal/day)} = [(0.1283 + 0.0481 \times IBW \text{ (kg)} + 0.0234 \times \text{height (cm)} -$   
14  
15  
16  
17  
18  $0.0138 \times \text{age (year)} - 0.5473 \times \text{sex coefficient (man: 1, woman:2)}] \times 293$ .<sup>19</sup> Total  
19  
20  
21  
22 energy expenditure (TEE) was calculated by manufactured regression equation using  
23  
24  
25  
26  
27  
28  
29  
30  
31  
32  
33  
34  
35  
36  
37  
38  
39  
40  
41  
42  
43  
44  
45  
46  
47  
48  
49  
50  
51  
52  
53  
54  
55  
56  
57  
58  
59  
60  
METs assessed by the triaxial accelerometer.<sup>18</sup> Physical activity level (PAL) was  
calculated by the following equation.  $PAL = TEE / BMR$ .<sup>20</sup>

### **Blood examination, BNP measurements**

After a 12-h overnight fast, venous blood samples were taken from the antecubital vein  
and collected into tubes. We measured FPG, HbA1c and serum insulin. FPG was  
measured using an enzymatic method (Wako Pure Chemical Industries, Osaka, Japan).  
Serum insulin and HbA1c were measured by automated enzyme-linked immunosorbent  
assays (TOSOH, Tokyo, Japan). We used homeostasis model assessment-estimated  
insulin resistance (HOMA-IR) as the marker for insulin resistance.<sup>21</sup> Plasma BNP levels  
were measured using specific immunoradiometric assay for human BNP (ARCHITECT

BNP-JP<sup>®</sup>, ABBOTT JAPAN Co., Ltd, Tokyo, Japan).<sup>22</sup>

### Statistical analysis

Data were expressed as the mean  $\pm$  standard deviation (SD). Correlations among BNP, age, BMI, waist circumference, blood pressure, FPG, HbA1c, serum insulin levels, HOMA-IR and PAL were assessed by using the Pearson's correlation coefficient. Multiple regression analysis was performed to test the independent correlation of PAL with plasma BNP levels. We divided participants into high-BNP group ( $\geq 8.0$  pg/ml) and low-BNP group ( $< 8.0$  pg/ml) by the median values of BNP. Differences in serum insulin levels, HOMA-IR and PAL between high-BNP group and low-BNP group were analyzed by the Mann-Whitney U test. The statistical analyses were performed by using SPSS version 19 (IBM Co., Ltd, Chicago, USA). P value  $< 0.05$  was considered to be statistically significant.

### RESULTS

**Table 1** presents the clinical characteristics of 60 participants (28 men and 32 women). 30 participants were diagnosed as having type 2 diabetes, 15 participants were with IFG and 15 participants were with IGT. The range of age in participants studied was 27-74

1  
2  
3  
4  
5  
6 years old.  
7  
8

9 PAL evaluated by a triaxial accelerometer was significantly and positively  
10 correlated with plasma BNP levels ( $r=0.328$ ,  $p=0.011$ ; **Figure 1**). Furthermore, PAL  
11 was still significantly correlated with plasma BNP levels after adjustment for age  
12 ( $\beta=0.320$ ,  $p=0.016$ ), and adjustment for age and BMI ( $\beta=0.312$ ,  $p=0.019$ ).  
13  
14  
15  
16  
17  
18  
19

20 **Table 2** shows the correlations of plasma BNP levels to clinical and metabolic  
21 parameters in participants. There were no significant correlations of plasma BNP levels  
22 with age, BMI, waist circumference, systolic and diastolic blood pressure, FPG and  
23 HbA1c. Plasma BNP levels were significantly and inversely correlated with serum  
24 insulin levels and HOMA-IR.  
25  
26  
27  
28  
29  
30  
31  
32  
33  
34

35 To further understand the associations of plasma BNP levels with insulin  
36 resistance, we examined the differences in serum insulin levels and HOMA-IR between  
37 high-BNP group and low-BNP group (**Figure 2**). Serum insulin levels (mean  $\pm$  SD,  $8.1$   
38  $\pm 6.4$  U/ml) in high-BNP group were significantly lower than those ( $11.2 \pm 7.4$  U/ml) in  
39 low-BNP group. HOMA-IR ( $2.4 \pm 1.9$ ) in high-BNP group were also significantly lower  
40 than those ( $3.7 \pm 3.0$ ) in low-BNP group.  
41  
42  
43  
44  
45  
46  
47  
48  
49  
50  
51  
52  
53  
54

## 55 **DISCUSSION**

56  
57  
58  
59  
60

1  
2  
3  
4  
5  
6 Recent cross-sectional studies reported that plasma BNP or NT-proBNP levels were  
7  
8 inversely associated with visceral fat,<sup>23</sup> BMI, waist circumference and serum insulin  
9  
10 levels.<sup>9 10</sup> However, the effect of daily physical activity on plasma BNP levels remains  
11  
12 unknown. Previous cross-sectional studies have not ever been performed by using  
13  
14 individuals with glucose intolerance as our study participants. In the present study, we  
15  
16 examined the correlation of daily physical activity measured objectively by a triaxial  
17  
18 accelerometer with plasma BNP levels, in patients with prediabetes and early untreated  
19  
20 type 2 diabetes.  
21  
22  
23  
24  
25  
26  
27  
28

29 Present study demonstrate a significant and positive association between daily  
30  
31 physical activity and plasma BNP levels, and also an inverse association of plasma BNP  
32  
33 levels with serum insulin levels and HOMA-IR. Previous studies reported that exercise  
34  
35 such as bicycle and hand-grip exercise acutely increase plasma BNP levels with  
36  
37 exercise intensity in healthy individuals.<sup>13 14</sup> However, the effect of daily physical  
38  
39 activity on plasma BNP levels remains unknown. It is noteworthy that we could observe  
40  
41 a significant effect of low-intensity daily physical activity, including walking, dishing  
42  
43 and washing clothes, defined as NEAT,<sup>15</sup> on plasma BNP levels. Chainani-Wu N, et al.  
44  
45 previously conducted a nested prospective cohort study of a lifestyle intervention, to  
46  
47 understand the effects of lifestyle on BNP. They observed the change in BNP for 3  
48  
49  
50  
51  
52  
53  
54  
55  
56  
57  
58  
59  
60

1  
2  
3  
4  
5  
6 months was significantly associated with the change in exercise score, even after  
7  
8  
9 controlling the percentage of change in BMI, which agreed with a significant and  
10  
11 positive correlation between PAL and plasma BNP levels after adjustment by age and  
12  
13 BMI in our study. At 3 months in their study, they found an inverse association of the  
14  
15 change in BNP with the changes in BMI and insulin,<sup>24</sup> suggesting a significant  
16  
17 association between BNP and insulin resistance.  
18  
19  
20  
21

22  
23 An inverse association between natriuretic peptide and obesity and/or insulin  
24  
25 resistance has been established.<sup>8-10 23 25 26</sup> However, controversy exists as to this  
26  
27 association. Lower natriuretic peptide levels in obese individuals has been reported to  
28  
29 be due to increased clearance by the natriuretic peptide receptors (NPR)-C abundantly  
30  
31 expressed in adipose tissue, and also due to decreased natriuretic peptide release from  
32  
33 the heart.<sup>27-29</sup> BNP binds to NPR on adipose tissue and stimulate lipolysis,<sup>30</sup> regulates  
34  
35 adipose tissue by activation of proliferator-activated receptor gamma (PPAR $\gamma$ ) gene  
36  
37 expression<sup>31</sup> and increases adiponectin secretion,<sup>32</sup> which improves insulin resistance.  
38  
39  
40  
41  
42  
43  
44  
45

46  
47 Evidences for the association of glucose intolerance with BNP are very limited. A  
48  
49 previous study reported that diabetes was significantly associated with low plasma BNP  
50  
51 levels (adjusted OR 1.51 (1.00 to 2.27) for men; adjusted OR 1.95 (1.26 to 3.02) for  
52  
53 women).<sup>8</sup> However, the underlying mechanisms for low BNP levels in patients with  
54  
55  
56  
57  
58  
59  
60

1  
2  
3  
4  
5  
6 impaired glucose metabolism remain unknown. In present study, PAL was positively  
7  
8  
9 correlated with plasma BNP levels, which was inversely correlated with the marker for  
10  
11  
12 insulin resistance. Furthermore, serum insulin levels and HOMA-IR were significantly  
13  
14  
15 lower in high-BNP group as compared with those in low-BNP group. However, neither  
16  
17  
18 BMI and waist circumference were correlated with plasma BNP levels. Increased PAL  
19  
20  
21 may elevate plasma BNP, which may ameliorate insulin resistance through various  
22  
23  
24 mechanisms, such as reduced oxidative stress,<sup>33</sup> decreased systemic inflammation,<sup>34</sup>  
25  
26  
27 stimulated lipolysis,<sup>30</sup> activation of PPAR $\gamma$  gene expression and increased adiponectin  
28  
29  
30 secretion.<sup>31 32</sup> However, the relationships among PAL, BNP and insulin resistance in  
31  
32  
33 impaired glucose metabolism remain largely unknown. We should perform further  
34  
35  
36 studies, preferably using a greater number of patients with glucose intolerance.

37  
38  
39  
40  
41  
42  
43  
44  
45  
46  
47  
48  
49  
50  
51  
52  
53  
54  
55  
56  
57  
58  
59  
60  
There are several limitations that need to be considered when interpreting the  
results of this study. This is a cross-sectional study, limiting inferences of causality and  
its direction. Although we controlled for some confounding factors (age, sex, BMI,  
engagement in sports-like exercise or resistance training, and medication), other factors  
such as genetic variation were not taken into account. Furthermore, we studied only  
patients with IFG, IGT and type 2 diabetes, therefore, our conclusions cannot apply to  
healthy populations. A heterogeneous group of individuals with IFG, IGT and type 2



1  
2  
3  
4  
5  
6 diabetes was examined. We could not mention that the associations between BNP and  
7  
8  
9 physical activity or insulin resistance were the same in three groups. We will study these  
10  
11  
12 associations, by using a great number of patients with each type of glucose intolerance,  
13  
14  
15 in the future. The triaxial accelerometer is an extensively validated device for evaluating  
16  
17  
18 physical activity under free living conditions,<sup>35-37</sup> however, Leenders et al indicated that  
19  
20  
21 the predictive equations based on the relationship between acceleration and energy  
22  
23  
24 expenditure (EE) during locomotive movements led to under- and overestimation of  
25  
26  
27 TEE.<sup>38</sup> It is possible that EE and PAL assessed by a triaxial accelerometer differ from  
28  
29  
30 the true amounts of EE and PAL.

31  
32 In conclusion, we found a significant and positive association between PAL and  
33  
34  
35 plasma BNP levels in patients with prediabetes and early untreated type 2 diabetes.  
36  
37  
38 Plasma BNP levels were inversely associated with insulin resistance. Our findings  
39  
40  
41 propose the possibility that BNP could be increased by daily physical activity and  
42  
43  
44 plasma BNP is beneficially associated with insulin resistance.  
45  
46  
47  
48

### 49 **Contributors**

50  
51  
52 The study was carried out in collaboration between all authors. HH, HY and OE  
53  
54  
55 conceived and designed the study. HH and MN performed the study. HH, HY and MK  
56  
57  
58  
59  
60

1  
2  
3  
4  
5  
6 analyzed the data, interpreted the results and wrote the manuscript. HH and HY also  
7  
8  
9 discussed analyses, interpretation, presentation and participated in drafting the  
10  
11  
12 manuscript.

### 13 14 15 16 17 18 **Funding**

19  
20 This study was supported by a grant from the National Center for Global Health and  
21  
22  
23 Medicine (25-203).  
24  
25  
26  
27  
28

### 29 **Competing interests**

30  
31  
32 The authors declare that there are no conflicts of interest.  
33  
34  
35  
36  
37

### 38 **Ethics approval**

39  
40 The study was approved by the Medical Ethics Committee of National Center for  
41  
42  
43 Global Health and Medicine (reference number NCGM-G-001212-00).  
44  
45  
46  
47  
48

### 49 **Provenance and peer review**

50  
51  
52 Not commissioned; externally peer reviewed.  
53  
54  
55  
56  
57  
58  
59  
60

### Data sharing statement

No additional data are available.

### REFERENCES

1. Gardner DG, Chen S, Glenn DJ, Grigsby CL. Molecular biology of the natriuretic peptide system: implications for physiology and hypertension. *Hypertension* 2007;49:419-26.
2. Maeda K, Tsutamoto T, Wada A, et al. High levels of plasma brain natriuretic peptide and interleukin-6 after optimized treatment for heart failure are independent risk factors for morbidity and mortality in patients with congestive heart failure. *J Am Coll Cardiol* 2000;36:1587-93.
3. Wang TJ, Larson MG, Levy D, et al. Plasma natriuretic peptide levels and the risk of cardiovascular events and death. *N Engl J Med* 2004;350:655-63.
4. Alehagen U, Lindstedt G, Levin LA, Dahlström U. Risk of cardiovascular death in elderly patients with possible heart failure. B-type natriuretic peptide (BNP) and the aminoterminal fragment of ProBNP (N-terminal proBNP) as prognostic indicators in a 6-year follow-up of a primary care population. *Int J Cardiol* 2005;100:125-33.
5. Kroon MH, van den Hurk K, Alsema M, et al. Prospective associations of B-type

1  
2  
3  
4  
5  
6 natriuretic peptide with markers of left ventricular function in individuals with and  
7  
8  
9 without type 2 diabetes: an 8-year follow-up of the Hoorn Study. *Diabetes Care*  
10  
11  
12 2012;35:2510-14.

13  
14  
15 6. Olsen MH, Wachtell K, Tuxen C, et al. N-terminal pro-brain natriuretic peptide  
16  
17 predicts cardiovascular events in patients with hypertension and left ventricular  
18  
19 hypertrophy: a LIFE study. *J Hypertens* 2004;22:1597-604.  
20  
21  
22

23  
24 7. Schirmer H, Omland T. Circulating N-terminal pro-atrial natriuretic peptide is an  
25  
26 independent predictor of left ventricular hypertrophy in the general population. The  
27  
28 Tromsø Study. *Eur Heart J* 1999;20:755-63.  
29  
30  
31

32  
33 8. Wang TJ, Larson MG, Levy D, et al. Impact of obesity on plasma natriuretic peptide  
34  
35 levels. *Circulation* 2004;109:594-600.  
36  
37

38  
39 9. Koizumi M, Watanabe H, Kaneko Y, et al. Impact of obesity on plasma B-type  
40  
41 natriuretic peptide levels in Japanese community-based subjects. *Heart Vessels* 2012;  
42  
43 27:287-294.  
44  
45

46  
47 10. Olsen MH, Hansen TW, Christensen MK, et al. N-terminal pro brain natriuretic  
48  
49 peptide is inversely related to metabolic cardiovascular risk factors and the metabolic  
50  
51 syndrome. *Hypertension* 2005, 46:660-6.  
52  
53  
54

55  
56 11. Hamilton MT, Hamilton DG, Zderic TW. Role of low energy expenditure and sitting  
57  
58  
59  
60

1  
2  
3  
4  
5  
6 in obesity, metabolic syndrome, type 2 diabetes, and cardiovascular disease. *Diabetes*  
7  
8  
9 2007;56:2655-67.

10  
11 12. Avery L, Flynn D, van Wersch A, Sniehotta FF, Trenell MI. Changing physical  
12  
13 activity behavior in type 2 diabetes: a systematic review and meta-analysis of behavioral  
14  
15 interventions. *Diabetes Care* 2012;35:2681-89.  
16  
17

18  
19 20. Barletta G, Stefani L, Del Bene R, et al. Effects of exercise on natriuretic peptides  
21  
22 and cardiac function in man. *Int J Cardiol* 1998;65:217-25.  
23  
24

25  
26 26. Nielsen HB, De Palo EF, Meneghetti M, Madsen PL, Ihlemann N, Secher NH.  
27  
28 Circulating immunoreactive proANP1-30 and proANP31-67 responses to acute exercise.  
29  
30  
31  
32 *Regul Pept* 2001;99:203-7.  
33  
34

35  
36 36. Levine JA. Non-exercise activity thermogenesis (NEAT). *Nutr Rev* 2004;62:S82-97.  
37

38  
39 39. American Diabetes Association. Diagnosis and classification of diabetes mellitus.  
40  
41  
42 *Diabetes Care* 2010;33:S62-9.  
43

44  
45 45. Oshima Y, Kawaguchi K, Tanaka S, et al. Classifying household and locomotive  
46  
47 activities using a triaxial accelerometer. *Gait Posture* 2010;31:370-4.  
48

49  
50 50. Ohkawara K, Oshima Y, Hikiyama Y, Ishikawa-Takata K, Tabata I, Tanaka S.  
51  
52 Real-time estimation of daily physical activity intensity by a triaxial accelerometer and  
53  
54 a gravity-removal classification algorithm. *Br J Nutr* 2011;105:1681-91.  
55  
56  
57  
58

- 1  
2  
3  
4  
5  
6 19. Ganpule AA, Tanaka S, Ishikawa-Takata K, Tabata I. Interindividual variability in  
7  
8  
9 sleeping metabolic rate in Japanese subjects. *Eur J Clin Nutr* 2007;61:1256-61.  
10  
11  
12 20. Energy and protein requirements. Report of a joint FAO/WHO/UNU Expert  
13  
14 Consultation. *World Health Organ Tech Rep Ser* 1985;724:1-206.  
15  
16  
17 21. Matthews DR, Hosker JP, Rudenski AS, Naylor BA, Treacher DF, Turner RC.  
18  
19 Homeostasis model assessment: insulin resistance and beta-cell function from fasting  
20  
21 plasma glucose and insulin concentrations in man. *Diabetologia* 1985;28:412-419.  
22  
23  
24 22. Mongia SK, La'ulu SL, Apple FS, Ler R, Murakami MM, Roberts WL. Performance  
25  
26 characteristics of the Architect brain natriuretic peptide (BNP) assay: a two site study.  
27  
28  
29  
30  
31  
32  
33 *Clin Chim Acta* 2008;391:102-5.  
34  
35 23. Neeland IJ, Winders BR, Ayers CR, et al. Higher natriuretic peptide levels associate  
36  
37 with a favorable adipose tissue distribution profile. *J Am Coll Cardiol* 2013;62:752-60.  
38  
39  
40 24. Chainani-Wu N, Weidner G, Purnell DM, et al. Relation of B-type natriuretic  
41  
42 peptide levels to body mass index after comprehensive lifestyle changes. *Am J Cardiol*  
43  
44  
45  
46  
47 2010;105:1570-6.  
48  
49 25. Mehra MR, Uber PA, Park MH, et al. Obesity and suppressed B-type natriuretic  
50  
51 peptide levels in heart failure. *J Am Coll Cardiol* 2004;43:1590-5.  
52  
53  
54  
55 26. McCord J, Mundy BJ, Hudson MP, et al. Relationship between obesity and B-type  
56  
57  
58  
59  
60

1  
2  
3  
4  
5  
6 natriuretic peptide levels. *Arch Intern Med* 2004;164:2247-52.  
7

8  
9 27. Dessì-Fulgheri P, Sarzani R, Tamburrini P, et al. Plasma atrial natriuretic peptide and  
10  
11 natriuretic peptide receptor gene expression in adipose tissue of normotensive and  
12  
13 hypertensive obese patients. *J Hypertens* 1997;15:1695-9.  
14  
15

16  
17 28. Das SR, Drazner MH, Dries DL, et al. Impact of body mass and body composition  
18  
19 on circulating levels of natriuretic peptides: results from the Dallas Heart Study.  
20  
21  
22  
23  
24  
25  
26  
27  
28  
29  
30  
31  
32  
33  
34  
35  
36  
37  
38  
39  
40  
41  
42  
43  
44  
45  
46  
47  
48  
49  
50  
51  
52  
53  
54  
55  
56  
57  
58  
59  
60  
*Circulation* 2005;112:2163-8.

29. Costello-Boerrigter LC, Burnett JC Jr. A new role for the natriuretic peptides:  
metabolic regulators of the adipocyte. *J Am Coll Cardiol* 2009;53:2078-9.

30. Sengenès C, Berlan M, De Glisezinski I, Lafontan M, Galitzky J. Natriuretic  
peptides: a new lipolytic pathway in human adipocytes. *FASEB J* 2000;14:1345-51.

31. Miyashita K, Itoh H, Tsujimoto H, et al. Natriuretic  
peptides/cGMP/cGMP-dependent protein kinase cascades promote muscle  
mitochondrial biogenesis and prevent obesity. *Diabetes* 2009;58:2880-92.

32. Tsukamoto O, Fujita M, Kato M, et al. Natriuretic peptides enhance the production  
of adiponectin in human adipocytes and in patients with chronic heart failure. *J Am Coll  
Cardiol* 2009;53:2070-7.

33. Rajagopalan S, Kurz S, Münzel T, et al. Angiotensin II-mediated hypertension in the

1  
2  
3  
4  
5  
6 rat increases vascular superoxide production via membrane NADH/NADPH oxidase  
7  
8  
9 activation. Contribution to alterations of vasomotor tone. *J Clin Invest*  
10  
11  
12 1996;97:1916-23.

13  
14 34. Moro C, Klimcakova E, Lolmède K, et al. Atrial natriuretic peptide inhibits the  
15  
16  
17 production of adipokines and cytokines linked to inflammation and insulin resistance in  
18  
19  
20 human subcutaneous adipose tissue. *Diabetologia* 2007;50:1038-47.

21  
22  
23 35. Plasqui G, Bonomi AG, Westerterp KR. Daily physical activity assessment with  
24  
25  
26 accelerometers: new insights and validation studies. *Obes Rev* 2013;14:451-62.

27  
28  
29 36. Midorikawa T, Tanaka S, Kaneko K, et al. Evaluation of low-intensity physical  
30  
31  
32 activity by triaxial accelerometry. *Obesity* 2007;15:3031-8.

33  
34  
35 37. Ekelund U, Sjöström M, Yngve A, et al. Physical activity assessed by activity  
36  
37  
38 monitor and doubly labeled water in children. *Med Sci Sports Exerc* 2001;33:275-81.

39  
40  
41 38. Leenders NY, Sherman WM, Nagaraja HN. Energy expenditure estimated by  
42  
43  
44 accelerometry and doubly labeled water: do they agree? *Med Sci Sports Exerc*  
45  
46  
47 2006;38:2165-72.



1  
2  
3  
4  
5  
6 (figure legends)  
7  
8

9 **Figure 1** Correlation of physical activity level and plasma BNP levels in 60 subjects.  
10

11 r indicates correlation coefficient analyzed by the Pearson's correlation.  
12  
13

14  
15  
16  
17 **Figure 2** Serum insulin levels and homeostatic model assessment-estimated insulin  
18 resistance (HOMA-IR) in high-BNP group (n = 30) and low-BNP group (n = 30). Data  
19 are mean values±SD. We divided subjects into high-BNP group ( $\geq 8.0$  pg/ml) and  
20 low-BNP group ( $< 8.0$  pg/ml) by the median values of BNP. Differences in serum  
21 insulin levels and HOMA-IR between high-BNP group and low-BNP group were  
22 analyzed by the Mann-Whitney U test.  
23  
24  
25  
26  
27  
28  
29  
30  
31  
32  
33  
34  
35  
36  
37  
38  
39  
40  
41  
42  
43  
44  
45  
46  
47  
48  
49  
50  
51  
52  
53  
54  
55  
56  
57  
58  
59  
60

**Table 1** Clinical and biochemical characteristics of subjects

|                                 |              |
|---------------------------------|--------------|
| n                               | 60           |
| Age (years)                     | 54.7 ± 12.2  |
| Height (cm)                     | 161.3 ± 8.9  |
| Weight (kg)                     | 69.2 ± 16.1  |
| BMI (kg/m <sup>2</sup> )        | 26.5 ± 5.1   |
| Waist circumference (cm)        | 92.4 ± 13.1  |
| Systolic blood pressure (mmHg)  | 128.8 ± 17.6 |
| Diastolic blood pressure (mmHg) | 80.5 ± 12.5  |
| Fasting plasma glucose (mg/dl)  | 122.9 ± 25.6 |
| HbA1c (%)                       | 6.7 ± 1.1    |
| BNP (pg/ml)                     | 14.0 ± 14.6  |
| Serum insulin (μU/ml)           | 9.6 ± 6.9    |
| HOMA-IR                         | 3.02 ± 2.62  |

Data are expressed as the mean ± SD. BMI: body mass index, BNP: B-type natriuretic peptide, HOMA-IR: homeostasis model assessment-estimated insulin resistance,

**Table 2** Correlations of plasma BNP levels to clinical and metabolic parameters

|                                 | correlation coefficient | <i>P</i> Value |
|---------------------------------|-------------------------|----------------|
| Age (years)                     | 0.245                   | 0.060          |
| BMI (kg/cm <sup>2</sup> )       | -0.184                  | 0.159          |
| Waist circumference (cm)        | -0.217                  | 0.096          |
| Systolic blood pressure (mmHg)  | 0.103                   | 0.436          |
| Diastolic blood pressure (mmHg) | -0.020                  | 0.883          |
| Fasting plasma glucose (mg/dl)  | -0.209                  | 0.098          |
| HbA1c (%)                       | -0.014                  | 0.917          |
| Serum insulin (μU/ml)           | -0.287                  | 0.026          |
| HOMA-IR                         | -0.294                  | 0.023          |

BMI: body mass index, BNP: B-type natriuretic peptide, HOMA-IR: homeostasis model assessment-estimated insulin resistance.

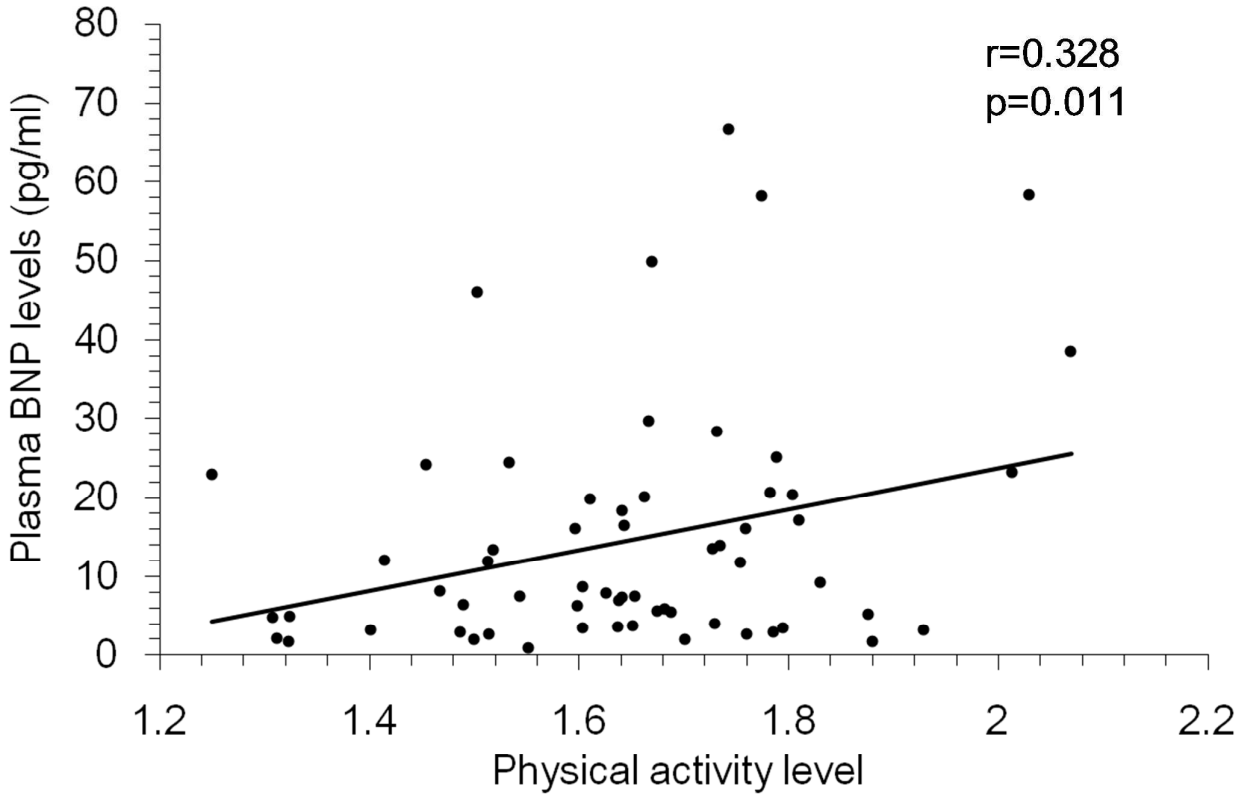

Figure 1

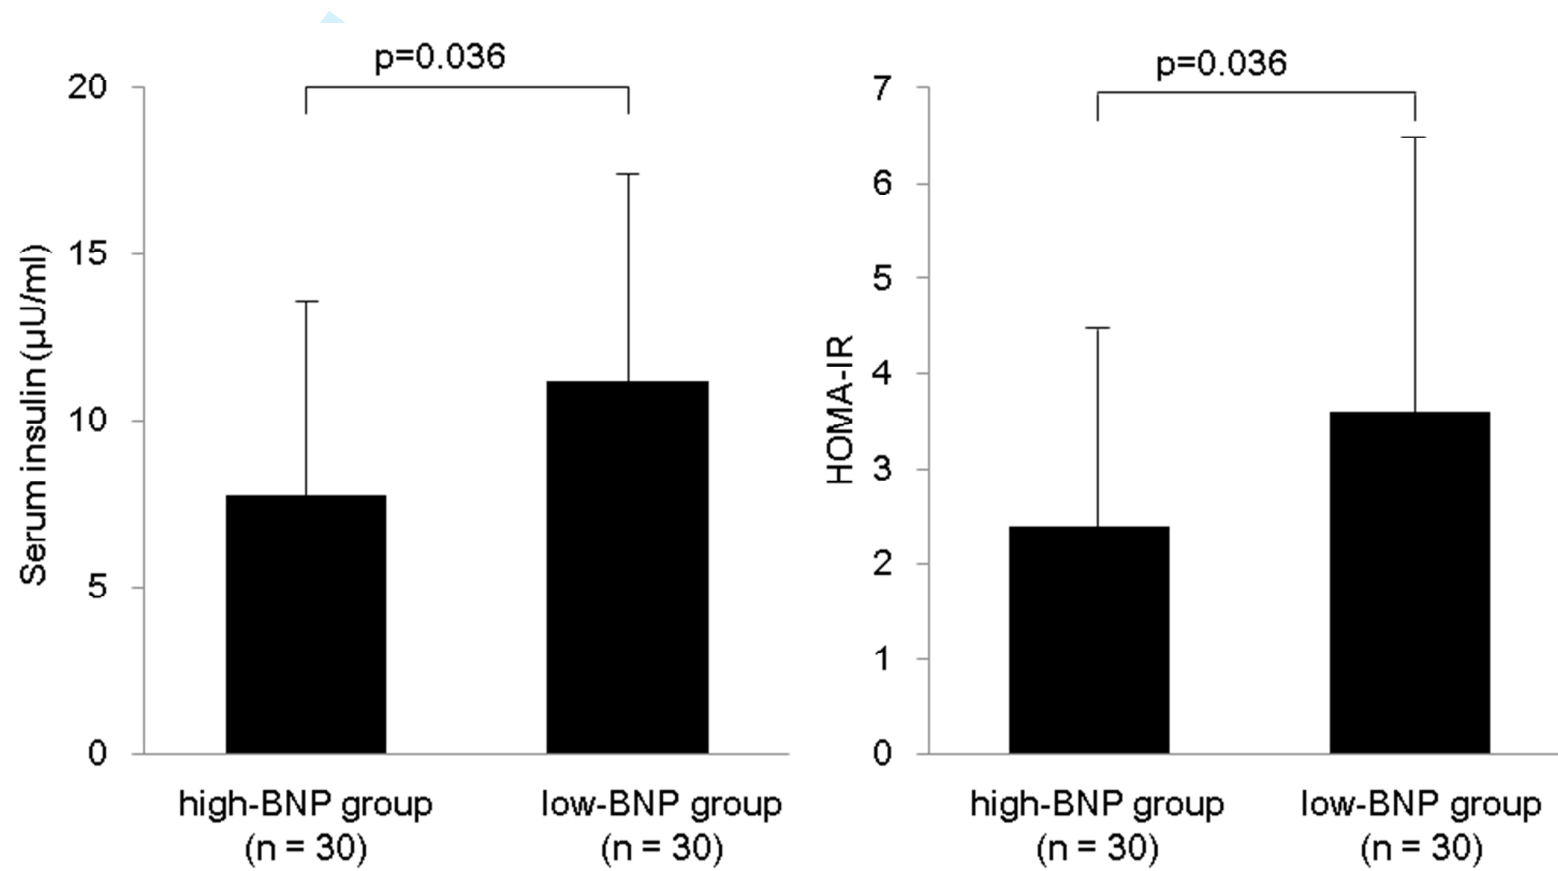

Figure 2

# BMJ Open

## A significant association of daily physical activity with plasma B-type natriuretic peptide in patients with glucose intolerance: a cross-sectional study

|                                 |                                                                                                                                                                                                                                                                                                                                                                                                                                            |
|---------------------------------|--------------------------------------------------------------------------------------------------------------------------------------------------------------------------------------------------------------------------------------------------------------------------------------------------------------------------------------------------------------------------------------------------------------------------------------------|
| Journal:                        | <i>BMJ Open</i>                                                                                                                                                                                                                                                                                                                                                                                                                            |
| Manuscript ID:                  | bmjopen-2014-006276.R1                                                                                                                                                                                                                                                                                                                                                                                                                     |
| Article Type:                   | Research                                                                                                                                                                                                                                                                                                                                                                                                                                   |
| Date Submitted by the Author:   | 25-Nov-2014                                                                                                                                                                                                                                                                                                                                                                                                                                |
| Complete List of Authors:       | Hamasaki, Hidetaka; National Center for Global Health and Medicine Kohnodai Hospital, Department of Internal Medicine<br>Yanai, Hidekatsu; National Center for Global Health and Medicine Kohnodai Hospital, Department of Internal Medicine<br>Kakei, Masafumi; Jichi Medical University School of Medicine, Noda, Mitsuhiro; Center Hospital, National Center for Global Health and Medicine,<br>Ezaki, Osamu; Showa Women's University, |
| <b>Primary Subject Heading</b>: | Diabetes and endocrinology                                                                                                                                                                                                                                                                                                                                                                                                                 |
| Secondary Subject Heading:      | Diabetes and endocrinology                                                                                                                                                                                                                                                                                                                                                                                                                 |
| Keywords:                       | DIABETES & ENDOCRINOLOGY, SPORTS MEDICINE, PUBLIC HEALTH                                                                                                                                                                                                                                                                                                                                                                                   |
|                                 |                                                                                                                                                                                                                                                                                                                                                                                                                                            |

SCHOLARONE™  
Manuscripts

only

**Research****A significant association of daily physical activity with plasma B-type natriuretic peptide in patients with glucose intolerance: a cross-sectional study in National Center for Global Health and Medicine**

Hidetaka Hamasaki,<sup>1,2</sup> Hidekatsu Yanai,<sup>1</sup> Masafumi Kakei,<sup>2</sup> Mitsuhiro Noda,<sup>3</sup> Osamu Ezaki<sup>4</sup>

<sup>1</sup> Department of Internal Medicine, National Center for Global Health and Medicine Kohnodai Hospital, Chiba, Japan.

<sup>2</sup> Division of Complementary Medicine, First Department of General Medicine, Saitama Medical Center, Jichi Medical University School of Medicine, Saitama, Japan.

<sup>3</sup> Department of Diabetes and Metabolic Medicine, Center Hospital, National Center for Global Health and Medicine, Tokyo, Japan.

<sup>4</sup> Department of Human Health and Design, Faculty of Human Life and Environmental Sciences, Showa Women's University, Tokyo, Japan.

**Correspondence to**

Hidekatsu Yanai, MD, PhD, FACP, Department of Internal Medicine, National Center  
for Global Health and Medicine Kohnodai Hospital, 1-7-1 Kohnodai, Chiba 272-8516,  
Japan. E-mail: [dyanai@hospk.ncgm.go.jp](mailto:dyanai@hospk.ncgm.go.jp); Telephone: +81-47-372-3501; Fax:  
+81-47-372-1858

**Keywords:** B-type natriuretic peptide; glucose intolerance; insulin resistance; physical  
activity; type 2 diabetes

**Word count:** 2,732 words



**ABSTRACT**

**Objectives:** In spite of accumulating evidences suggesting an inverse association between insulin resistance and plasma B-type natriuretic peptide (BNP) levels, the effect of daily physical activity on plasma BNP in individuals with glucose intolerance remains unknown. We investigated the association of physical activity level (PAL) with plasma BNP in patients with impaired fasting glucose, impaired glucose tolerance and type 2 diabetes.

**Design:** Cross-sectional study.

**Setting:** Outpatients visiting National Center for Global Health and Medicine Kohnodai Hospital.

**Participants:** A total of 60 patients with glucose intolerance who did not take any hypoglycemic agents, cholesterol lowering agents and antihypertensive agents were recruited. Patients who were diagnosed as having heart failure and renal impairment, engaged in sports-like exercise and resistance training were excluded.

**Primary outcome measures:** PAL was objectively measured by a triaxial accelerometer. The association between PAL and plasma BNP levels was assessed by multiple regression analysis.

**Results:** PAL was positively correlated with plasma BNP levels ( $r=0.296$ ,  $p=0.021$ ).

1  
2  
3  
4  
5  
6 PAL was still significantly correlated with plasma BNP levels after adjustment for age  
7  
8  
9 ( $\beta=0.290$ ,  $p=0.014$ ), and adjustment for age and BMI ( $\beta=0.282$ ,  $p=0.018$ ). Plasma BNP  
10  
11  
12 levels were inversely correlated with serum insulin levels ( $r=-0.350$ ,  $p=0.006$ ) and  
13  
14 homeostasis model assessment-estimated insulin resistance (HOMA-IR) ( $r=-0.363$ ,  
15  
16  $p=0.004$ ). Serum insulin levels (mean  $\pm$  SD,  $8.1 \pm 6.4$   $\mu\text{U/ml}$ ) and HOMA-IR ( $2.4 \pm$   
17  
18  $1.9$ ) in high-BNP group were significantly lower than those ( $11.2 \pm 7.4$   $\mu\text{U/ml}$  and  $3.7 \pm$   
19  
20  $3.0$ , respectively) in low-BNP group.  
21  
22  
23  
24

25  
26 **Conclusions:** Our findings propose the possibility that plasma BNP may be increased  
27  
28  
29 by daily physical activity and BNP is associated with insulin resistance.  
30  
31  
32  
33  
34  
35  
36  
37  
38  
39  
40  
41  
42  
43  
44  
45  
46  
47  
48  
49  
50  
51  
52  
53  
54  
55  
56  
57  
58  
59  
60

### Strengths and limitations of this study

- This study provides novel data: objectively measured light-intensity daily physical activity using a triaxial accelerometer is positively associated with plasma BNP levels in patients with glucose intolerance.
- Our study evaluated precisely an association between daily physical activity and plasma BNP levels, by recruiting drug-naive patients who were not engaged in sports-like exercise.
- Previous studies reported an inverse association between plasma BNP levels and the markers for insulin resistance in healthy subjects. To our knowledge, our study is the first to show a significant association between plasma BNP levels and insulin resistance in patients with glucose intolerance.
- The limitations are the small sample size and the cross-sectional design which does not allow us to establish any causal relationship.
- Even a triaxial accelerometer may lead to under or overestimation of energy expenditure. It can be denied that energy expenditure assessed by a triaxial accelerometer differ from the true amounts.

## INTRODUCTION

B-type natriuretic peptide (BNP) belongs to the cardiac natriuretic peptide family which are released from the heart in response to pressure and volume overload.<sup>1</sup> Plasma BNP and N-terminal proBNP (Nt-proBNP) are increased with the severity of left ventricular dysfunction and/or hypertrophy, therefore, it has become a useful biomarker for diagnosis and prognosis of heart failure with or without type 2 diabetes.<sup>2-7</sup>

Plasma BNP levels have been reported to be inversely related to body mass index (BMI) and waist circumference in individuals without heart failure.<sup>8-9</sup> Very recently, Olsen MH, et al. reported that Nt-proBNP was significantly lower in individuals with the metabolic syndrome as compared with those without the metabolic syndrome.<sup>10</sup> In their study, Nt-proBNP levels were inversely correlated with BMI, waist circumference, serum cholesterol and triglyceride, plasma glucose and insulin, independently of age and gender.<sup>10</sup> These results suggest that BNP is beneficially associated with obesity and obesity-related metabolic disorders.

Low physical activity and sedentary lifestyle induce the development of type 2 diabetes, and also deteriorate glucose control in patients with type 2 diabetes.<sup>11-12</sup> Exercise such as bicycle and hand-grip exercise has been reported to acutely increase plasma BNP levels with exercise intensity, in healthy individuals.<sup>13-14</sup> However, the

1  
2  
3  
4  
5  
6 effect of daily physical activity on plasma BNP levels remain obscure. To our  
7  
8  
9 knowledge, there were no previous studies that investigated the association between  
10  
11  
12 daily physical activity and plasma BNP levels in patients with glucose intolerance.  
13

14  
15 Here, we studied the association of physical activity level (PAL) which was  
16  
17 evaluated objectively by using a triaxial accelerometer, with plasma BNP levels, in  
18  
19 patients with impaired fasting glucose (IFG), impaired glucose tolerance (IGT) and type  
20  
21 2 diabetes. Furthermore, we elucidated the correlations of plasma BNP levels to  
22  
23 metabolic parameters in patients with such glucose intolerance.  
24  
25  
26  
27  
28  
29  
30  
31

## 32 **MATERIAL AND METHODS**

### 33 34 **Study protocol and participants**

35  
36  
37 The study protocol was approved by the Medical Ethics Committee of National Center  
38  
39 for Global Health and Medicine (reference number NCGM-G-001212). We studied 60  
40  
41 participants (28 men and 32 women) who did not take any hypoglycemic agents,  
42  
43  
44 cholesterol lowering agents and antihypertensive agents. To understand the effects of  
45  
46  
47 daily physical activity such as non-exercise activity thermogenesis (NEAT)<sup>15</sup> on BNP  
48  
49  
50 and metabolic parameters, participants who were engaged in sports-like exercise and  
51  
52  
53 resistance training were excluded. Participants with heart failure and renal impairment  
54  
55  
56  
57  
58  
59  
60

1  
2  
3  
4  
5  
6 were also excluded. The participants were diagnosed as having type 2 diabetes  
7  
8  
9 according to diagnostic criteria set to serum levels of hemoglobin A1c (HbA1c)  $\geq$   
10  
11  
12 6.5 %, fasting plasma glucose (FPG)  $\geq$  126 mg/dl, casual plasma glucose  $\geq$  200  
13  
14 mg/dl and 2-h values in the 75 g oral glucose tolerance test (OGTT)  $\geq$  200 mg/dl.<sup>16</sup>  
15  
16  
17 The participants were defined as having IFG and IGT according to FPG levels 110  
18  
19 mg/dl to 125 mg/dl, or 2-h values in the OGTT of 140 mg/dl to 199 mg/dl.<sup>16</sup>  
20  
21  
22  
23  
24  
25

### 26 **Anthropometric and physiological measurements**

27  
28  
29 Height and weight were measured using a rigid stadiometer and scales (DP-7100PW,  
30  
31 Yamato Co., Ltd, Hyogo, Japan). Waist circumference around the navel was measured  
32  
33 with a metal anthropometric tape while participants are standing and breathing out. BMI  
34  
35 was calculated as the body weight in kilograms divided by the height in meters squared.  
36  
37  
38 Blood pressure was measured with participants in a seated position using an automatic  
39  
40 sphygmomanometer (HEM-762, Omron Co., Ltd, Kyoto, Japan).  
41  
42  
43  
44  
45  
46  
47  
48

### 49 **Physical activity measurement**

50  
51  
52 Daily physical activity was measured using a triaxial accelerometer (Active Style Pro  
53  
54 HJA-350IT, Omron Co., Ltd, Kyoto, Japan), 74 x 46 x 34 mm and 60 g including  
55  
56  
57  
58  
59  
60

1  
2  
3  
4  
5  
6 batteries. Participants studied wore the accelerometer on the left side of the waist.  
7  
8  
9 Anteroposterior, mediolateral and vertical acceleration measurements were obtained  
10  
11 during each physical activity at a rate of 32 Hz to 12-bit accuracy. Each of three signals  
12  
13 from the triaxial accelerometer was passed through a high-pass filter with a cut-off  
14  
15 frequency of 0.7 Hz to remove the gravitational acceleration component. The ratios of  
16  
17 unfiltered to filtered total acceleration (TAU/TAF) and filtered vertical and horizontal  
18  
19 acceleration (VAF/HAF) were calculated to determine the cut-off value for the  
20  
21 classification of locomotive activities and non-locomotive activities including such as  
22  
23 household and occupational activities, which resulted in almost 100% accurate  
24  
25 demarcation for daily eleven different activities.<sup>17</sup> Furthermore, metabolic equivalent  
26  
27 values (METs) determined by this triaxial accelerometer have been reported to be  
28  
29 closely correlated with METs calculated by using energy expenditure (EE) measured by  
30  
31 indirect calorimetry.<sup>17 18</sup>  
32  
33  
34  
35  
36  
37  
38  
39  
40  
41  
42  
43

44 Participants studied wore the accelerometer on the left side of the waist for  
45  
46 consecutive 7 days, and physical activities were recorded. Participants were requested to  
47  
48 wear the accelerometer except under special circumstances such as sleeping, bathing  
49  
50 and during aquatic activities. Activity data were stored on a minute-by-minute basis and  
51  
52 were downloaded to a personal computer before analysis. We excluded days in which  
53  
54  
55  
56  
57  
58  
59  
60

1  
2  
3  
4  
5  
6 participants did not wear the accelerometer for more than 8 hours from the data for  
7  
8  
9 analysis.

10  
11 Basal metabolic rate (BMR) was estimated from multiple regression equation  
12 including age, sex, height and ideal body weight (IBW) as variables, the equation as  
13 follows:  $BMR \text{ (kcal/day)} = [(0.1283 + 0.0481 \times IBW \text{ (kg)} + 0.0234 \times \text{height (cm)} -$   
14  
15  
16  
17  
18  $0.0138 \times \text{age (year)} - 0.5473 \times \text{sex coefficient (man: 1, woman:2)}] \times 293$ .<sup>19</sup> Total  
19  
20  
21 energy expenditure (TEE) was calculated by manufactured regression equation using  
22  
23  
24  
25  
26  
27  
28  
29  
30  
31  
32  
33  
34  
35  
36  
37  
38  
39  
40  
41  
42  
43  
44  
45  
46  
47  
48  
49  
50  
51  
52  
53  
54  
55  
56  
57  
58  
59  
60  
METs assessed by the triaxial accelerometer.<sup>18</sup> Physical activity level (PAL) was  
calculated by the following equation.  $PAL = TEE / BMR$ .<sup>20</sup>

### **Blood examination, BNP measurements**

After a 12-h overnight fast, blood samples were taken from the antecubital vein and  
collected into tubes. We measured FPG, HbA1c and serum insulin. FPG was measured  
using an enzymatic method (Wako Pure Chemical Industries, Osaka, Japan). Serum  
insulin and HbA1c were measured by automated enzyme-linked immunosorbent assays  
(TOSOH, Tokyo, Japan). We used homeostasis model assessment-estimated insulin  
resistance (HOMA-IR) as the marker for insulin resistance.<sup>21</sup> Plasma BNP (BNP 1-32)  
levels were measured using specific immunoradiometric assay for human BNP



1  
2  
3  
4  
5  
6 (ARCHITECT BNP-JP<sup>®</sup>, ABBOTT JAPAN Co., Ltd, Tokyo, Japan).<sup>22</sup> Imprecision  
7  
8  
9 studies yielded within run CVs of 1.1 to 5.1% and total CVs of 2.3 to 5.3% using human  
10  
11  
12 plasma based multi-constituent controls at concentrations of 92, 500, and 3500 ng/L.<sup>22</sup>  
13

### 14 15 **Statistical analysis**

16  
17 Data were expressed as the mean  $\pm$  standard deviation (SD). Correlations among BNP,  
18  
19 age, BMI, waist circumference, blood pressure, FPG, HbA1c, serum insulin levels,  
20  
21 HOMA-IR and PAL were assessed by using the Spearman's rank correlation coefficient.  
22  
23  
24 Multiple regression analysis was performed to test the independent correlation of PAL  
25  
26 with plasma BNP levels. We divided participants into high-BNP group ( $\geq 8.0$  pg/ml)  
27  
28 and low-BNP group ( $< 8.0$  pg/ml) by the median values of BNP. Differences in serum  
29  
30 insulin levels, HOMA-IR and PAL between high-BNP group and low-BNP group were  
31  
32 analyzed by the Mann-Whitney U test. The statistical analyses were performed by using  
33  
34 SPSS version 19 (IBM Co., Ltd, Chicago, USA). P value  $< 0.05$  was considered to be  
35  
36 statistically significant.  
37  
38  
39  
40  
41  
42  
43  
44  
45  
46  
47  
48

### 49 **RESULTS**

50  
51 **Table 1** presents the clinical characteristics of 60 participants (28 men and 32 women).  
52  
53  
54  
55 31 participants were diagnosed as having type 2 diabetes, 14 participants were with IFG  
56  
57  
58  
59  
60

and 15 participants were with IGT. The range of age in participants studied was 27-74 years old.

**Table 1** Clinical and biochemical characteristics of subjects

|                                 |              |
|---------------------------------|--------------|
| n                               | 60           |
| Age (years)                     | 54.7 ± 12.2  |
| Height (cm)                     | 161.3 ± 8.9  |
| Weight (kg)                     | 69.2 ± 16.1  |
| BMI (kg/m <sup>2</sup> )        | 26.5 ± 5.1   |
| Waist circumference (cm)        | 92.4 ± 13.1  |
| Systolic blood pressure (mmHg)  | 128.8 ± 17.6 |
| Diastolic blood pressure (mmHg) | 80.5 ± 12.5  |
| Fasting plasma glucose (mg/dl)  | 122.9 ± 25.6 |
| HbA1c (%)                       | 6.7 ± 1.1    |
| BNP (pg/ml)                     | 14.0 ± 14.6  |
| Serum insulin (μU/ml)           | 9.6 ± 6.9    |
| HOMA-IR                         | 3.02 ± 2.62  |

Data are expressed as the mean ± SD. BMI, body mass index; BNP, B-type

1  
2  
3  
4  
5  
6 natriuretic peptide; HOMA-IR, homeostasis model assessment-estimated  
7  
8  
9 insulin resistance.

10  
11  
12  
13  
14  
15 PAL evaluated by a triaxial accelerometer was significantly and positively  
16  
17 correlated with plasma BNP levels ( $r=0.296$ ,  $p=0.021$ ; **Figure 1**). Age was correlated  
18  
19 with BMI ( $r=-0.431$ ,  $p<0.001$ ), but not correlated with PAL ( $r=0.096$ ,  $p=0.462$ ). BMI  
20  
21 was not correlated with PAL ( $r=-0.11$ ,  $p=0.4$ ). The values of PAL showed a normal  
22  
23 distribution ( $p=0.453$  by Shapiro-Wilk test), however, plasma BNP levels showed  
24  
25 non-normal distribution ( $p<0.001$ ). Multivariate logistic regression was used after  
26  
27 controlling simultaneously for potential confounders. Variables considered in the  
28  
29 models were age (continuous) and BMI (continuous). To adjust the correlation between  
30  
31 PAL and plasma BNP by age and BMI, plasma BNP values were logarithmically  
32  
33 transformed. PAL was still significantly correlated with log plasma BNP levels after  
34  
35 adjustment for age ( $\beta=0.290$ ,  $p=0.014$ ), and adjustment for age and BMI ( $\beta=0.282$ ,  
36  
37  $p=0.018$ ).

38  
39  
40  
41  
42  
43  
44  
45  
46  
47  
48  
49 **Table 2** shows the correlations of plasma BNP levels to clinical and metabolic  
50  
51 parameters in participants.  
52  
53  
54  
55  
56  
57  
58  
59  
60

**Table 2** Correlations of plasma BNP levels to clinical and metabolic parameters

|                                 | correlation coefficient | <i>P</i> Value |
|---------------------------------|-------------------------|----------------|
| Age (years)                     | 0.441                   | <0.001         |
| BMI (kg/m <sup>2</sup> )        | -0.256                  | 0.048          |
| Waist circumference (cm)        | -0.279                  | 0.031          |
| Systolic blood pressure (mmHg)  | 0.175                   | 0.185          |
| Diastolic blood pressure (mmHg) | -0.070                  | 0.598          |
| Fasting plasma glucose (mg/dl)  | -0.237                  | 0.068          |
| HbA1c (%)                       | 0.050                   | 0.705          |
| Serum insulin (μU/ml)           | -0.350                  | 0.006          |
| HOMA-IR                         | -0.363                  | 0.004          |

BMI, body mass index; BNP, B-type natriuretic peptide; HOMA-IR, homeostasis model assessment-estimated insulin resistance. A statistical analysis was performed by the Spearman's rank correlation coefficient.

There were no significant correlations of plasma BNP levels with systolic and diastolic blood pressure, FPG and HbA1c. Plasma BNP levels were significantly and

1  
2  
3  
4  
5  
6 inversely correlated with BMI, waist circumference, serum insulin levels and  
7  
8  
9 HOMA-IR, and were positively correlated with age. Significant correlations of plasma  
10  
11  
12 BNP levels with serum insulin ( $\beta=-0.204$ ,  $p=0.119$ ) and HOMA-IR ( $\beta=-0.271$ ,  
13  
14  
15  $p=0.129$ ) were lost after adjusting for PAL.

16  
17  
18 To further understand the associations of plasma BNP levels with insulin  
19  
20  
21 resistance, we examined the differences in serum insulin levels and HOMA-IR between  
22  
23  
24 high-BNP group and low-BNP group (**Figure 2**). Serum insulin levels (mean  $\pm$  SD,  $8.1$   
25  
26  $\pm 6.4$  U/ml) in high-BNP group were significantly lower than those ( $11.2 \pm 7.4$  U/ml) in  
27  
28  
29 low-BNP group. HOMA-IR ( $2.4 \pm 1.9$ ) in high-BNP group were also significantly lower  
30  
31  
32 than those ( $3.7 \pm 3.0$ ) in low-BNP group. We also analyzed the relationship between  
33  
34  
35 quartiles of plasma BNP versus serum insulin and HOMA-IR (**Figure 3**). We found a  
36  
37  
38 significant influence of plasma BNP on both serum insulin ( $p=0.018$  by the  
39  
40  
41 Kruskal-Wallis ANOVA) and HOMA-IR ( $p=0.018$ ). Serum insulin level in the highest  
42  
43  
44 plasma BNP quartile was significantly lower than in the lowest plasma BNP quartile.  
45  
46  
47 HOMA-IR in the highest plasma BNP quartile was also significantly lower than in the  
48  
49  
50 lowest plasma BNP quartile.

51  
52  
53 The mean  $\pm$  SD of plasma BNP levels in patients with type 2 diabetes (13 men  
54  
55  
56 and 18 women), IFG (5 men and 9 women) and IGT (10 men and 5 women) were 14.3  
57  
58  
59  
60

1  
2  
3  
4  
5  
6  $\pm 13.5$  pg/ml,  $12.9 \pm 17.2$  pg/ml and  $14.5 \pm 15.1$  pg/ml, respectively. The mean  $\pm$  SD of  
7  
8  
9 PAL in patients with type 2 diabetes, IFG and IGT were  $1.66 \pm 0.22$ ,  $1.65 \pm 0.15$  and  
10  
11  $1.66 \pm 0.20$ , respectively. There were no significant differences in plasma BNP levels  
12  
13 and PAL among patients with type 2 diabetes, IFG and IGT.  
14  
15  
16  
17  
18  
19

## 20 **DISCUSSION**

21  
22  
23 Recent cross-sectional studies reported that plasma BNP or NT-proBNP levels were  
24  
25 inversely associated with visceral fat,<sup>23</sup> BMI, waist circumference and serum insulin  
26  
27 levels.<sup>9 10</sup> However, the effect of daily physical activity on plasma BNP levels remains  
28  
29 unknown. Previous cross-sectional studies have not ever been performed by using  
30  
31 individuals with glucose intolerance as our study participants. In the present study, we  
32  
33 examined the correlation of daily physical activity measured objectively by a triaxial  
34  
35 accelerometer with plasma BNP levels, in patients with prediabetes and early untreated  
36  
37 type 2 diabetes.  
38  
39  
40  
41  
42  
43  
44  
45

46 Present study demonstrates a significant and positive association between daily  
47  
48 physical activity and plasma BNP levels, and also an inverse association of plasma BNP  
49  
50 levels with BMI, waist circumference, serum insulin levels and HOMA-IR. Previous  
51  
52 studies reported that exercise such as bicycle and hand-grip exercise acutely increase  
53  
54  
55  
56  
57  
58  
59  
60

1  
2  
3  
4  
5  
6 plasma BNP levels with exercise intensity in healthy individuals.<sup>13 14</sup> However, the  
7  
8  
9 effect of daily physical activity on plasma BNP levels remains unknown. It is  
10  
11  
12 noteworthy that we could observe a significant effect of low-intensity daily physical  
13  
14 activity, including walking, dishing and washing clothes, defined as NEAT,<sup>15</sup> on plasma  
15  
16 BNP levels. Chainani-Wu N, et al. previously conducted a nested prospective cohort  
17  
18 study of a lifestyle intervention, to understand the effects of lifestyle on BNP. They  
19  
20  
21 observed the change in BNP for 3 months was significantly associated with the change  
22  
23 in exercise score, even after controlling the percentage of change in BMI, which agreed  
24  
25  
26 with a significant and positive correlation between PAL and plasma BNP levels after  
27  
28  
29 adjustment by age and BMI in our study. At 3 months in their study, they found an  
30  
31  
32 inverse association of the change in BNP with the changes in BMI and insulin,<sup>24</sup>  
33  
34  
35 suggesting a significant association between BNP and insulin resistance.  
36  
37  
38

39  
40  
41 An inverse association between natriuretic peptide and obesity and/or insulin  
42  
43 resistance has been established.<sup>8-10 23 25 26</sup> However, controversy exists as to this  
44  
45  
46 association. Lower natriuretic peptide levels in obese individuals has been reported to  
47  
48  
49 be due to increased clearance by the natriuretic peptide receptors (NPR)-C abundantly  
50  
51  
52 expressed in adipose tissue, and also due to decreased natriuretic peptide release from  
53  
54  
55 the heart.<sup>27-29</sup> BNP binds to NPR on adipose tissue and stimulate lipolysis,<sup>30</sup> regulates  
56  
57  
58  
59  
60

1  
2  
3  
4  
5  
6 adipose tissue by activation of proliferator-activated receptor gamma (PPAR $\gamma$ ) gene  
7  
8 expression<sup>31</sup> and increases adiponectin secretion,<sup>32</sup> which improves insulin resistance.

9  
10  
11 Evidences for the association of glucose intolerance with BNP are very limited. A  
12  
13 previous study reported that diabetes was significantly associated with low plasma BNP  
14  
15 levels (adjusted OR 1.51 (1.00 to 2.27) for men; adjusted OR 1.95 (1.26 to 3.02) for  
16  
17 women).<sup>8</sup> However, the underlying mechanisms for low BNP levels in patients with  
18  
19 impaired glucose metabolism remain unknown. In present study, PAL was positively  
20  
21 correlated with plasma BNP levels, which was inversely correlated with the marker for  
22  
23 insulin resistance. Furthermore, serum insulin levels and HOMA-IR were significantly  
24  
25 lower in high-BNP group as compared with those in low-BNP group. BMI and waist  
26  
27 circumference were also correlated with plasma BNP levels. Increased PAL may be  
28  
29 associated with reduction of BMI and waist circumference, which improves insulin  
30  
31 resistance and induce elevation of plasma BNP, due to decreased clearance by NPR-C  
32  
33 abundantly expressed in adipose tissue. Otherwise, increased plasma BNP may  
34  
35 ameliorate insulin resistance through various mechanisms, such as reduced oxidative  
36  
37 stress,<sup>33</sup> decreased systemic inflammation,<sup>34</sup> stimulated lipolysis,<sup>30</sup> activation of PPAR $\gamma$   
38  
39 gene expression and increased adiponectin secretion.<sup>31 32</sup> Recently, increased plasma  
40  
41 BNP levels and/or biological activity could also improve insulin resistance by  
42  
43  
44  
45  
46  
47  
48  
49  
50  
51  
52  
53  
54  
55  
56  
57  
58  
59  
60



1  
2  
3  
4  
5  
6 increasing mitochondrial fat oxidative capacity in white and brown fat, as well as in  
7  
8 skeletal muscle.<sup>35 36</sup> However, the cardiac ejection fraction is also inversely related  
9  
10 with plasma BNP levels but is not beneficial,<sup>2-7</sup> and plasma BNP levels are reported to  
11  
12 increase lipolysis,<sup>37</sup> and to be positively associated insulin resistance.<sup>38</sup> The  
13  
14 relationships among PAL, BNP and insulin resistance in impaired glucose metabolism  
15  
16 remain largely unknown. We should perform further studies, preferably using a greater  
17  
18 number of patients with glucose intolerance.  
19  
20  
21  
22  
23  
24

25  
26 There are several limitations that need to be considered when interpreting the  
27  
28 results of this study. This is a cross-sectional study, limiting inferences of causality and  
29  
30 its direction. Although we controlled for some confounding factors (age, sex, BMI,  
31  
32 engagement in sports-like exercise or resistance training, and medication), other factors  
33  
34 such as genetic variation were not taken into account. Furthermore, we studied only  
35  
36 patients with IFG, IGT and type 2 diabetes, therefore, our conclusions cannot apply to  
37  
38 healthy populations. A heterogeneous group of individuals with IFG, IGT and type 2  
39  
40 diabetes was examined. We could not mention that the associations between BNP and  
41  
42 physical activity or insulin resistance were the same in three groups. We will study these  
43  
44 associations, by using a great number of patients with each type of glucose intolerance,  
45  
46 in the future. The triaxial accelerometer is an extensively validated device for evaluating  
47  
48  
49  
50  
51  
52  
53  
54  
55  
56  
57  
58  
59  
60

1  
2  
3  
4  
5  
6 physical activity under free living conditions,<sup>39-41</sup> however, Leenders et al indicated that  
7  
8  
9 the predictive equations based on the relationship between acceleration and energy  
10  
11  
12 expenditure (EE) during locomotive movements led to under- and overestimation of  
13  
14  
15 TEE.<sup>42</sup> It is possible that EE and PAL assessed by a triaxial accelerometer differ from  
16  
17  
18 the true amounts of EE and PAL.

19  
20  
21 In conclusion, we found a significant and positive association between PAL and  
22  
23  
24 plasma BNP levels in patients with prediabetes and early untreated type 2 diabetes.  
25  
26  
27 Plasma BNP levels were inversely associated with insulin resistance. Our findings  
28  
29  
30 propose the possibility that BNP could be increased by daily physical activity and  
31  
32  
33 plasma BNP is beneficially associated with insulin resistance.  
34  
35  
36  
37

### 38 **Contributors**

39  
40  
41 The study was carried out in collaboration between all authors. HH, HY and OE  
42  
43  
44 conceived and designed the study. HH and MN performed the study. HH, HY and MK  
45  
46  
47 analyzed the data, interpreted the results and wrote the manuscript. HH and HY also  
48  
49  
50 discussed analyses, interpretation, presentation and participated in drafting the  
51  
52  
53 manuscript.  
54  
55  
56  
57  
58  
59  
60

**Funding**

This study was supported by a grant from the National Center for Global Health and Medicine (25-203).

**Competing interests**

The authors declare that there are no conflicts of interest.

**Ethics approval**

The study was approved by the Medical Ethics Committee of National Center for Global Health and Medicine (reference number NCGM-G-001212).

**Provenance and peer review**

Not commissioned; externally peer reviewed.

**Data sharing statement**

No additional data are available.

**REFERENCES**

- 1  
2  
3  
4  
5  
6 1. Gardner DG, Chen S, Glenn DJ, Grigsby CL. Molecular biology of the natriuretic  
7  
8 peptide system: implications for physiology and hypertension. *Hypertension*  
9  
10 2007;49:419-26.  
11
- 12  
13  
14 2. Maeda K, Tsutamoto T, Wada A, et al. High levels of plasma brain natriuretic  
15  
16 peptide and interleukin-6 after optimized treatment for heart failure are independent risk  
17  
18 factors for morbidity and mortality in patients with congestive heart failure. *J Am Coll*  
19  
20 *Cardiol* 2000;36:1587-93.  
21  
22
- 23  
24  
25 3. Wang TJ, Larson MG, Levy D, et al. Plasma natriuretic peptide levels and the risk of  
26  
27 cardiovascular events and death. *N Engl J Med* 2004;350:655-63.  
28  
29
- 30  
31  
32 4. Alehagen U, Lindstedt G, Levin LA, Dahlström U. Risk of cardiovascular death in  
33  
34 elderly patients with possible heart failure. B-type natriuretic peptide (BNP) and the  
35  
36 aminoterminal fragment of ProBNP (N-terminal proBNP) as prognostic indicators in a  
37  
38 6-year follow-up of a primary care population. *Int J Cardiol* 2005;100:125-33.  
39  
40  
41
- 42  
43  
44 5. Kroon MH, van den Hurk K, Alsema M, et al. Prospective associations of B-type  
45  
46 natriuretic peptide with markers of left ventricular function in individuals with and  
47  
48 without type 2 diabetes: an 8-year follow-up of the Hoorn Study. *Diabetes Care*  
49  
50 2012;35:2510-14.  
51  
52
- 53  
54  
55 6. Olsen MH, Wachtell K, Tuxen C, et al. N-terminal pro-brain natriuretic peptide  
56  
57  
58  
59  
60

1  
2  
3  
4  
5  
6 predicts cardiovascular events in patients with hypertension and left ventricular  
7  
8 hypertrophy: a LIFE study. *J Hypertens* 2004;22:1597-604.

9  
10  
11 7. Schirmer H, Omland T. Circulating N-terminal pro-atrial natriuretic peptide is an  
12 independent predictor of left ventricular hypertrophy in the general population. The  
13 Tromsø Study. *Eur Heart J* 1999;20:755-63.

14  
15  
16 8. Wang TJ, Larson MG, Levy D, et al. Impact of obesity on plasma natriuretic peptide  
17 levels. *Circulation* 2004;109:594-600.

18  
19  
20 9. Koizumi M, Watanabe H, Kaneko Y, et al. Impact of obesity on plasma B-type  
21 natriuretic peptide levels in Japanese community-based subjects. *Heart Vessels* 2012;  
22 27:287-294.

23  
24  
25 10. Olsen MH, Hansen TW, Christensen MK, et al. N-terminal pro brain natriuretic  
26 peptide is inversely related to metabolic cardiovascular risk factors and the metabolic  
27 syndrome. *Hypertension* 2005, 46:660-6.

28  
29  
30 11. Hamilton MT, Hamilton DG, Zderic TW. Role of low energy expenditure and sitting  
31 in obesity, metabolic syndrome, type 2 diabetes, and cardiovascular disease. *Diabetes*  
32 2007;56:2655-67.

33  
34  
35 12. Avery L, Flynn D, van Wersch A, Sniehotta FF, Trenell MI. Changing physical  
36 activity behavior in type 2 diabetes: a systematic review and meta-analysis of behavioral  
37  
38  
39  
40  
41  
42  
43  
44  
45  
46  
47  
48  
49  
50  
51  
52  
53  
54  
55  
56  
57  
58  
59  
60

1  
2  
3  
4  
5  
6 interventions. *Diabetes Care* 2012;35:2681-89.

7  
8  
9 13. Barletta G, Stefani L, Del Bene R, et al. Effects of exercise on natriuretic peptides  
10  
11 and cardiac function in man. *Int J Cardiol* 1998;65:217-25.

12  
13  
14 14. Nielsen HB, De Palo EF, Meneghetti M, Madsen PL, Ihlemann N, Secher NH.  
15  
16 Circulating immunoreactive proANP1-30 and proANP31-67 responses to acute exercise.  
17  
18  
19  
20  
21  
22 *Regul Pept* 2001;99:203-7.

23  
24 15. Levine JA. Non-exercise activity thermogenesis (NEAT). *Nutr Rev* 2004;62:S82-97.

25  
26 16. American Diabetes Association. Diagnosis and classification of diabetes mellitus.  
27  
28  
29  
30  
31 *Diabetes Care* 2010;33:S62-9.

32  
33 17. Oshima Y, Kawaguchi K, Tanaka S, et al. Classifying household and locomotive  
34  
35  
36  
37 activities using a triaxial accelerometer. *Gait Posture* 2010;31:370-4.

38  
39 18. Ohkawara K, Oshima Y, Hikiyama Y, Ishikawa-Takata K, Tabata I, Tanaka S.  
40  
41  
42  
43  
44  
45  
46 Real-time estimation of daily physical activity intensity by a triaxial accelerometer and  
47  
48  
49  
50  
51 a gravity-removal classification algorithm. *Br J Nutr* 2011;105:1681-91.

52  
53 19. Ganpule AA, Tanaka S, Ishikawa-Takata K, Tabata I. Interindividual variability in  
54  
55  
56  
57  
58  
59  
60 sleeping metabolic rate in Japanese subjects. *Eur J Clin Nutr* 2007;61:1256-61.

60  
20. Energy and protein requirements. Report of a joint FAO/WHO/UNU Expert  
Consultation. *World Health Organ Tech Rep Ser* 1985;724:1-206.

- 1  
2  
3  
4  
5  
6 21. Matthews DR, Hosker JP, Rudenski AS, Naylor BA, Treacher DF, Turner RC.  
7  
8 Homeostasis model assessment: insulin resistance and beta-cell function from fasting  
9  
10 plasma glucose and insulin concentrations in man. *Diabetologia* 1985;28:412-419.  
11  
12  
13  
14 22. Mongia SK, La'ulu SL, Apple FS, Ler R, Murakami MM, Roberts WL. Performance  
15  
16 characteristics of the Architect brain natriuretic peptide (BNP) assay: a two site study.  
17  
18  
19  
20  
21 *Clin Chim Acta* 2008;391:102-5.  
22  
23  
24 23. Neeland IJ, Winders BR, Ayers CR, et al. Higher natriuretic peptide levels associate  
25  
26 with a favorable adipose tissue distribution profile. *J Am Coll Cardiol* 2013;62:752-60.  
27  
28  
29 24. Chainani-Wu N, Weidner G, Purnell DM, et al. Relation of B-type natriuretic  
30  
31 peptide levels to body mass index after comprehensive lifestyle changes. *Am J Cardiol*  
32  
33  
34  
35 2010;105:1570-6.  
36  
37  
38 25. Mehra MR, Uber PA, Park MH, et al. Obesity and suppressed B-type natriuretic  
39  
40 peptide levels in heart failure. *J Am Coll Cardiol* 2004;43:1590-5.  
41  
42  
43 26. McCord J, Mundy BJ, Hudson MP, et al. Relationship between obesity and B-type  
44  
45 natriuretic peptide levels. *Arch Intern Med* 2004;164:2247-52.  
46  
47  
48  
49 27. Dessì-Fulgheri P, Sarzani R, Tamburrini P, et al. Plasma atrial natriuretic peptide and  
50  
51 natriuretic peptide receptor gene expression in adipose tissue of normotensive and  
52  
53  
54  
55 hypertensive obese patients. *J Hypertens* 1997;15:1695-9.  
56  
57  
58  
59  
60

- 1  
2  
3  
4  
5  
6 28. Das SR, Drazner MH, Dries DL, et al. Impact of body mass and body composition  
7  
8 on circulating levels of natriuretic peptides: results from the Dallas Heart Study.  
9  
10 *Circulation* 2005;112:2163-8.  
11  
12  
13  
14 29. Costello-Boerrigter LC, Burnett JC Jr. A new role for the natriuretic peptides:  
15  
16 metabolic regulators of the adipocyte. *J Am Coll Cardiol* 2009;53:2078-9.  
17  
18  
19  
20 30. Sengenès C, Berlan M, De Glisezinski I, Lafontan M, Galitzky J. Natriuretic  
21  
22 peptides: a new lipolytic pathway in human adipocytes. *FASEB J* 2000;14:1345-51.  
23  
24  
25  
26 31. Miyashita K, Itoh H, Tsujimoto H, et al. Natriuretic  
27  
28 peptides/cGMP/cGMP-dependent protein kinase cascades promote muscle  
29  
30 mitochondrial biogenesis and prevent obesity. *Diabetes* 2009;58:2880-92.  
31  
32  
33  
34 32. Tsukamoto O, Fujita M, Kato M, et al. Natriuretic peptides enhance the production  
35  
36 of adiponectin in human adipocytes and in patients with chronic heart failure. *J Am Coll*  
37  
38 *Cardiol* 2009;53:2070-7.  
39  
40  
41  
42  
43 33. Rajagopalan S, Kurz S, Münzel T, et al. Angiotensin II-mediated hypertension in the  
44  
45 rat increases vascular superoxide production via membrane NADH/NADPH oxidase  
46  
47 activation. Contribution to alterations of vasomotor tone. *J Clin Invest*  
48  
49  
50  
51 1996;97:1916-23.  
52  
53  
54  
55 34. Moro C, Klimcakova E, Lolmède K, et al. Atrial natriuretic peptide inhibits the  
56  
57  
58  
59  
60



1  
2  
3  
4  
5  
6 production of adipokines and cytokines linked to inflammation and insulin resistance in  
7  
8 human subcutaneous adipose tissue. *Diabetologia* 2007;50:1038-47.

9  
10  
11 35. Bordicchia M, Liu D, Amri EZ, et al. Cardiac natriuretic peptides act via p38 MAPK  
12  
13 to induce the brown fat thermogenic program in mouse and human adipocytes. *J Clin*  
14  
15  
16  
17  
18  
19  
20  
21  
22  
23  
24  
25  
26  
27  
28  
29  
30  
31  
32  
33  
34  
35  
36  
37  
38  
39  
40  
41  
42  
43  
44  
45  
46  
47  
48  
49  
50  
51  
52  
53  
54  
55  
56  
57  
58  
59  
60

*Invest* 2012;122:1022-36.

36. Engeli S, Birkenfeld AL, Badin PM, et al. Natriuretic peptides enhance the oxidative  
capacity of human skeletal muscle. *J Clin Invest* 2012;122:4675-9.

37. Polak J, Kotrc M, Wedellova Z, et al. Lipolytic effects of B-type natriuretic peptide  
1-32 in adipose tissue of heart failure patients compared with healthy controls. *J Am*  
*Coll Cardiol* 2011;58:1119-25.

38. Tekes S, Cikim AS. The association of brain natriuretic peptide and insulin  
resistance in obesity-related hypertension. *J Hum Hypertens* 2007;21:546-50.

39. Plasqui G, Bonomi AG, Westerterp KR. Daily physical activity assessment with  
accelerometers: new insights and validation studies. *Obes Rev* 2013;14:451-62.

40. Midorikawa T, Tanaka S, Kaneko K, et al. Evaluation of low-intensity physical  
activity by triaxial accelerometry. *Obesity* 2007;15:3031-8.

41. Ekelund U, Sjöström M, Yngve A, et al. Physical activity assessed by activity  
monitor and doubly labeled water in children. *Med Sci Sports Exerc* 2001;33:275-81.

1  
2  
3  
4  
5  
6 42. Leenders NY, Sherman WM, Nagaraja HN. Energy expenditure estimated by  
7  
8  
9 accelerometry and doubly labeled water: do they agree? *Med Sci Sports Exerc*  
10  
11  
12 2006;38:2165-72.  
13  
14  
15  
16  
17  
18  
19  
20  
21  
22  
23  
24  
25  
26  
27  
28  
29  
30  
31  
32  
33  
34  
35  
36  
37  
38  
39  
40  
41  
42  
43  
44  
45  
46  
47  
48  
49  
50  
51  
52  
53  
54  
55  
56  
57  
58  
59  
60

For peer review only

(figure legends)

**Figure 1** Correlation of physical activity level and plasma BNP levels in 60 subjects.

r indicates correlation coefficient analyzed by the Spearman's rank correlation coefficient.

**Figure 2** Serum insulin levels (A) and homeostatic model assessment-estimated insulin resistance (HOMA-IR) (B) in high-BNP group (n = 30) and low-BNP group (n = 30).

Data are mean values±SD. We divided subjects into high-BNP group ( $\geq 8.0$  pg/ml) and low-BNP group ( $< 8.0$  pg/ml) by the median values of BNP. Differences in serum insulin levels and HOMA-IR between high-BNP group and low-BNP group were analyzed by the Mann-Whitney U test.

**Figure 3** Serum insulin levels (A) and homeostatic model assessment-estimated insulin resistance (HOMA-IR) (B) in each plasma BNP quartiles. Q1 is the lowest quartile and

Q4 is the highest quartile. Boxes indicate medians and quartiles; whiskers indicate the lowest and highest values. We found a significant influence of plasma BNP on both serum insulin (p=0.018 by the Kruskal-Wallis ANOVA) and HOMA-IR (p=0.018). The difference between Q1 and Q2-4 was statistically analyzed by the Scheffe's F Test.

1  
2  
3  
4  
5  
6  
7  
8  
9  
10  
11  
12  
13  
14  
15  
16  
17  
18  
19  
20  
21  
22  
23  
24  
25  
26  
27  
28  
29  
30  
31  
32  
33  
34  
35  
36  
37  
38  
39  
40  
41  
42  
43  
44  
45  
46  
47  
48  
49  
50  
51  
52  
53  
54  
55  
56  
57  
58  
59  
60

For peer review only

## Research

# A significant association of daily physical activity with plasma B-type natriuretic peptide in patients with glucose intolerance: a cross-sectional study in National Center for Global Health and Medicine

Hidetaka Hamasaki,<sup>1,2</sup> Hidekatsu Yanai,<sup>1</sup> Masafumi Kakei,<sup>2</sup> Mitsuhiro Noda,<sup>3</sup> Osamu Ezaki<sup>4</sup>

<sup>1</sup> Department of Internal Medicine, National Center for Global Health and Medicine Kohnodai Hospital, Chiba, Japan.

<sup>2</sup> Division of Complementary Medicine, First Department of General Medicine, Saitama Medical Center, Jichi Medical University School of Medicine, Saitama, Japan.

<sup>3</sup> Department of Diabetes and Metabolic Medicine, Center Hospital, National Center for Global Health and Medicine, Tokyo, Japan.

<sup>4</sup> Department of Human Health and Design, Faculty of Human Life and Environmental Sciences, Showa Women's University, Tokyo, Japan.

**Correspondence to**

Hidekatsu Yanai, MD, PhD, FACP, Department of Internal Medicine, National Center  
for Global Health and Medicine Kohnodai Hospital, 1-7-1 Kohnodai, Chiba 272-8516,  
Japan. E-mail: [dyanai@hospk.ncgm.go.jp](mailto:dyanai@hospk.ncgm.go.jp); Telephone: +81-47-372-3501; Fax:  
+81-47-372-1858

**Keywords:** B-type natriuretic peptide; glucose intolerance; insulin resistance; physical  
activity; type 2 diabetes

**Word count:** 2,732 words

**ABSTRACT**

**Objectives:** In spite of accumulating evidences suggesting an inverse association between insulin resistance and plasma B-type natriuretic peptide (BNP) levels, the effect of daily physical activity on plasma BNP in individuals with glucose intolerance remains unknown. We investigated the association of physical activity level (PAL) with plasma BNP in patients with impaired fasting glucose, impaired glucose tolerance and type 2 diabetes.

**Design:** Cross-sectional study.

**Setting:** Outpatients visiting National Center for Global Health and Medicine Kohnodai Hospital.

**Participants:** A total of 60 patients with glucose intolerance who did not take any hypoglycemic agents, cholesterol lowering agents and antihypertensive agents were recruited. Patients who were diagnosed as having heart failure and renal impairment, engaged in sports-like exercise and resistance training were excluded.

**Primary outcome measures:** PAL was objectively measured by a triaxial accelerometer. The association between PAL and plasma BNP levels was assessed by multiple regression analysis.

**Results:** PAL was positively correlated with plasma BNP levels ( $r=0.296$ ,  $p=0.021$ ).

1  
2  
3  
4  
5  
6 PAL was still significantly correlated with plasma BNP levels after adjustment for age  
7  
8  
9 ( $\beta=0.290$ ,  $p=0.014$ ), and adjustment for age and BMI ( $\beta=0.282$ ,  $p=0.018$ ). Plasma BNP  
10  
11  
12 levels were inversely correlated with serum insulin levels ( $r=-0.350$ ,  $p=0.006$ ) and  
13  
14 homeostasis model assessment-estimated insulin resistance (HOMA-IR) ( $r=-0.363$ ,  
15  
16  $p=0.004$ ). Serum insulin levels (mean  $\pm$  SD,  $8.1 \pm 6.4$   $\mu\text{U/ml}$ ) and HOMA-IR ( $2.4 \pm$   
17  
18  $1.9$ ) in high-BNP group were significantly lower than those ( $11.2 \pm 7.4$   $\mu\text{U/ml}$  and  $3.7 \pm$   
19  
20  $3.0$ , respectively) in low-BNP group.  
21  
22  
23  
24

25  
26 **Conclusions:** Our findings propose the possibility that plasma BNP may be increased  
27  
28  
29 by daily physical activity and BNP is associated with insulin resistance.  
30  
31  
32  
33  
34  
35  
36  
37  
38  
39  
40  
41  
42  
43  
44  
45  
46  
47  
48  
49  
50  
51  
52  
53  
54  
55  
56  
57  
58  
59  
60



### Strengths and limitations of this study

- This study provides novel data: objectively measured light-intensity daily physical activity using a triaxial accelerometer is positively associated with plasma BNP levels in patients with glucose intolerance.
- Our study evaluated precisely an association between daily physical activity and plasma BNP levels, by recruiting drug-naive patients who were not engaged in sports-like exercise.
- Previous studies reported an inverse association between plasma BNP levels and the markers for insulin resistance in healthy subjects. To our knowledge, our study is the first to show a significant association between plasma BNP levels and insulin resistance in patients with glucose intolerance.
- The limitations are the small sample size and the cross-sectional design which does not allow us to establish any causal relationship.
- Even a triaxial accelerometer may lead to under or overestimation of energy expenditure. It can be denied that energy expenditure assessed by a triaxial accelerometer differ from the true amounts.

## INTRODUCTION

B-type natriuretic peptide (BNP) belongs to the cardiac natriuretic peptide family which are released from the heart in response to pressure and volume overload.<sup>1</sup> Plasma BNP and N-terminal proBNP (Nt-proBNP) are increased with the severity of left ventricular dysfunction and/or hypertrophy, therefore, it has become a useful biomarker for diagnosis and prognosis of heart failure with or without type 2 diabetes.<sup>2-7</sup>

Plasma BNP levels have been reported to be inversely related to body mass index (BMI) and waist circumference in individuals without heart failure.<sup>8-9</sup> Very recently, Olsen MH, et al. reported that Nt-proBNP was significantly lower in individuals with the metabolic syndrome as compared with those without the metabolic syndrome.<sup>10</sup> In their study, Nt-proBNP levels were inversely correlated with BMI, waist circumference, serum cholesterol and triglyceride, plasma glucose and insulin, independently of age and gender.<sup>10</sup> These results suggest that BNP is beneficially associated with obesity and obesity-related metabolic disorders.

Low physical activity and sedentary lifestyle induce the development of type 2 diabetes, and also deteriorate glucose control in patients with type 2 diabetes.<sup>11-12</sup> Exercise such as bicycle and hand-grip exercise has been reported to acutely increase plasma BNP levels with exercise intensity, in healthy individuals.<sup>13-14</sup> However, the

1  
2  
3  
4  
5  
6 effect of daily physical activity on plasma BNP levels remain obscure. To our  
7  
8  
9 knowledge, there were no previous studies that investigated the association between  
10  
11  
12 daily physical activity and plasma BNP levels in patients with glucose intolerance.  
13

14  
15 Here, we studied the association of physical activity level (PAL) which was  
16  
17 evaluated objectively by using a triaxial accelerometer, with plasma BNP levels, in  
18  
19 patients with impaired fasting glucose (IFG), impaired glucose tolerance (IGT) and type  
20  
21 2 diabetes. Furthermore, we elucidated the correlations of plasma BNP levels to  
22  
23 metabolic parameters in patients with such glucose intolerance.  
24  
25  
26  
27  
28  
29  
30  
31

## 32 **MATERIAL AND METHODS**

### 33 34 **Study protocol and participants**

35  
36  
37 The study protocol was approved by the Medical Ethics Committee of National Center  
38  
39 for Global Health and Medicine (reference number NCGM-G-001212). We studied 60  
40  
41 participants (28 men and 32 women) who did not take any hypoglycemic agents,  
42  
43 cholesterol lowering agents and antihypertensive agents. To understand the effects of  
44  
45 daily physical activity such as non-exercise activity thermogenesis (NEAT)<sup>15</sup> on BNP  
46  
47 and metabolic parameters, participants who were engaged in sports-like exercise and  
48  
49 resistance training were excluded. Participants with heart failure and renal impairment  
50  
51  
52  
53  
54  
55  
56  
57  
58  
59  
60

1  
2  
3  
4  
5  
6 were also excluded. The participants were diagnosed as having type 2 diabetes  
7  
8  
9 according to diagnostic criteria set to serum levels of hemoglobin A1c (HbA1c)  $\geq$   
10  
11  
12 6.5 %, fasting plasma glucose (FPG)  $\geq$  126 mg/dl, casual plasma glucose  $\geq$  200  
13  
14 mg/dl and 2-h values in the 75 g oral glucose tolerance test (OGTT)  $\geq$  200 mg/dl.<sup>16</sup>  
15  
16  
17 The participants were defined as having IFG and IGT according to FPG levels 110  
18  
19 mg/dl to 125 mg/dl, or 2-h values in the OGTT of 140 mg/dl to 199 mg/dl.<sup>16</sup>  
20  
21  
22  
23  
24  
25

### 26 **Anthropometric and physiological measurements**

27  
28  
29 Height and weight were measured using a rigid stadiometer and scales (DP-7100PW,  
30  
31 Yamato Co., Ltd, Hyogo, Japan). Waist circumference around the navel was measured  
32  
33 with a metal anthropometric tape while participants are standing and breathing out. BMI  
34  
35 was calculated as the body weight in kilograms divided by the height in meters squared.  
36  
37  
38 Blood pressure was measured with participants in a seated position using an automatic  
39  
40 sphygmomanometer (HEM-762, Omron Co., Ltd, Kyoto, Japan).  
41  
42  
43  
44  
45  
46  
47  
48

### 49 **Physical activity measurement**

50  
51  
52 Daily physical activity was measured using a triaxial accelerometer (Active Style Pro  
53  
54 HJA-350IT, Omron Co., Ltd, Kyoto, Japan), 74 x 46 x 34 mm and 60 g including  
55  
56  
57  
58  
59  
60

1  
2  
3  
4  
5  
6 batteries. Participants studied wore the accelerometer on the left side of the waist.  
7  
8  
9 Anteroposterior, mediolateral and vertical acceleration measurements were obtained  
10  
11 during each physical activity at a rate of 32 Hz to 12-bit accuracy. Each of three signals  
12  
13 from the triaxial accelerometer was passed through a high-pass filter with a cut-off  
14  
15 frequency of 0.7 Hz to remove the gravitational acceleration component. The ratios of  
16  
17 unfiltered to filtered total acceleration (TAU/TAF) and filtered vertical and horizontal  
18  
19 acceleration (VAF/HAF) were calculated to determine the cut-off value for the  
20  
21 classification of locomotive activities and non-locomotive activities including such as  
22  
23 household and occupational activities, which resulted in almost 100% accurate  
24  
25 demarcation for daily eleven different activities.<sup>17</sup> Furthermore, metabolic equivalent  
26  
27 values (METs) determined by this triaxial accelerometer have been reported to be  
28  
29 closely correlated with METs calculated by using energy expenditure (EE) measured by  
30  
31 indirect calorimetry.<sup>17 18</sup>  
32  
33  
34  
35  
36  
37  
38  
39  
40  
41  
42  
43

44 Participants studied wore the accelerometer on the left side of the waist for  
45  
46 consecutive 7 days, and physical activities were recorded. Participants were requested to  
47  
48 wear the accelerometer except under special circumstances such as sleeping, bathing  
49  
50 and during aquatic activities. Activity data were stored on a minute-by-minute basis and  
51  
52 were downloaded to a personal computer before analysis. We excluded days in which  
53  
54  
55  
56  
57  
58  
59  
60

1  
2  
3  
4  
5  
6 participants did not wear the accelerometer for more than 8 hours from the data for  
7  
8  
9 analysis.

10  
11 Basal metabolic rate (BMR) was estimated from multiple regression equation  
12 including age, sex, height and ideal body weight (IBW) as variables, the equation as  
13 follows:  $BMR \text{ (kcal/day)} = [(0.1283 + 0.0481 \times IBW \text{ (kg)} + 0.0234 \times \text{height (cm)} -$   
14  
15  
16  
17  
18  
19  
20  
21  $0.0138 \times \text{age (year)} - 0.5473 \times \text{sex coefficient (man: 1, woman:2)}] \times 293$ .<sup>19</sup> Total  
22  
23 energy expenditure (TEE) was calculated by manufactured regression equation using  
24  
25  
26  
27  
28  
29  
30  
31  
32  
33  
34  
35  
36  
37  
38  
39  
40  
41  
42  
43  
44  
45  
46  
47  
48  
49  
50  
51  
52  
53  
54  
55  
56  
57  
58  
59  
60  
METs assessed by the triaxial accelerometer.<sup>18</sup> Physical activity level (PAL) was  
calculated by the following equation.  $PAL = TEE / BMR$ .<sup>20</sup>

### **Blood examination, BNP measurements**

After a 12-h overnight fast, blood samples were taken from the antecubital vein and  
collected into tubes. We measured FPG, HbA1c and serum insulin. FPG was measured  
using an enzymatic method (Wako Pure Chemical Industries, Osaka, Japan). Serum  
insulin and HbA1c were measured by automated enzyme-linked immunosorbent assays  
(TOSOH, Tokyo, Japan). We used homeostasis model assessment-estimated insulin  
resistance (HOMA-IR) as the marker for insulin resistance.<sup>21</sup> Plasma BNP (BNP 1-32)  
levels were measured using specific immunoradiometric assay for human BNP

1  
2  
3  
4  
5  
6 (ARCHITECT BNP-JP<sup>®</sup>, ABBOTT JAPAN Co., Ltd, Tokyo, Japan).<sup>22</sup> Imprecision  
7  
8  
9 studies yielded within run CVs of 1.1 to 5.1% and total CVs of 2.3 to 5.3% using human  
10  
11 plasma based multi-constituent controls at concentrations of 92, 500, and 3500 ng/L.<sup>22</sup>

### 14 15 **Statistical analysis**

16  
17 Data were expressed as the mean  $\pm$  standard deviation (SD). Correlations among BNP,  
18  
19 age, BMI, waist circumference, blood pressure, FPG, HbA1c, serum insulin levels,  
20  
21 HOMA-IR and PAL were assessed by using the Spearman's rank correlation coefficient.  
22  
23  
24 Multiple regression analysis was performed to test the independent correlation of PAL  
25  
26 with plasma BNP levels. We divided participants into high-BNP group ( $\geq 8.0$  pg/ml)  
27  
28 and low-BNP group ( $< 8.0$  pg/ml) by the median values of BNP. Differences in serum  
29  
30 insulin levels, HOMA-IR and PAL between high-BNP group and low-BNP group were  
31  
32 analyzed by the Mann-Whitney U test. The statistical analyses were performed by using  
33  
34 SPSS version 19 (IBM Co., Ltd, Chicago, USA). P value  $< 0.05$  was considered to be  
35  
36 statistically significant.  
37  
38  
39  
40  
41  
42  
43  
44  
45  
46  
47  
48

### 49 **RESULTS**

50  
51 **Table 1** presents the clinical characteristics of 60 participants (28 men and 32 women).  
52  
53  
54  
55 31 participants were diagnosed as having type 2 diabetes, 14 participants were with IFG  
56  
57  
58  
59  
60

and 15 participants were with IGT. The range of age in participants studied was 27-74 years old.

**Table 1** Clinical and biochemical characteristics of subjects

|                                 |              |
|---------------------------------|--------------|
| n                               | 60           |
| Age (years)                     | 54.7 ± 12.2  |
| Height (cm)                     | 161.3 ± 8.9  |
| Weight (kg)                     | 69.2 ± 16.1  |
| BMI (kg/m <sup>2</sup> )        | 26.5 ± 5.1   |
| Waist circumference (cm)        | 92.4 ± 13.1  |
| Systolic blood pressure (mmHg)  | 128.8 ± 17.6 |
| Diastolic blood pressure (mmHg) | 80.5 ± 12.5  |
| Fasting plasma glucose (mg/dl)  | 122.9 ± 25.6 |
| HbA1c (%)                       | 6.7 ± 1.1    |
| BNP (pg/ml)                     | 14.0 ± 14.6  |
| Serum insulin (μU/ml)           | 9.6 ± 6.9    |
| HOMA-IR                         | 3.02 ± 2.62  |

Data are expressed as the mean ± SD. BMI, body mass index; BNP, B-type



1  
2  
3  
4  
5  
6 natriuretic peptide; HOMA-IR, homeostasis model assessment-estimated  
7  
8  
9 insulin resistance.

10  
11  
12  
13  
14  
15 PAL evaluated by a triaxial accelerometer was significantly and positively  
16  
17 correlated with plasma BNP levels ( $r=0.296$ ,  $p=0.021$ ; **Figure 1**). Age was correlated  
18 with BMI ( $r=-0.431$ ,  $p<0.001$ ), but not correlated with PAL ( $r=0.096$ ,  $p=0.462$ ). BMI  
19 was not correlated with PAL ( $r=-0.11$ ,  $p=0.4$ ). The values of PAL showed a normal  
20 distribution ( $p=0.453$  by Shapiro-Wilk test), however, plasma BNP levels showed  
21 non-normal distribution ( $p<0.001$ ). Multivariate logistic regression was used after  
22 controlling simultaneously for potential confounders. Variables considered in the  
23 models were age (continuous) and BMI (continuous). To adjust the correlation between  
24 PAL and plasma BNP by age and BMI, plasma BNP values were logarithmically  
25 transformed. PAL was still significantly correlated with log plasma BNP levels after  
26  
27 adjustment for age ( $\beta=0.290$ ,  $p=0.014$ ), and adjustment for age and BMI ( $\beta=0.282$ ,  
28  $p=0.018$ ).

29  
30  
31  
32  
33  
34  
35  
36  
37  
38  
39  
40  
41  
42  
43  
44  
45  
46  
47  
48  
49 **Table 2** shows the correlations of plasma BNP levels to clinical and metabolic  
50 parameters in participants.  
51  
52  
53  
54  
55  
56  
57  
58  
59  
60

**Table 2** Correlations of plasma BNP levels to clinical and metabolic parameters

|                                 | correlation coefficient | <i>P</i> Value |
|---------------------------------|-------------------------|----------------|
| Age (years)                     | 0.441                   | <0.001         |
| BMI (kg/m <sup>2</sup> )        | -0.256                  | 0.048          |
| Waist circumference (cm)        | -0.279                  | 0.031          |
| Systolic blood pressure (mmHg)  | 0.175                   | 0.185          |
| Diastolic blood pressure (mmHg) | -0.070                  | 0.598          |
| Fasting plasma glucose (mg/dl)  | -0.237                  | 0.068          |
| HbA1c (%)                       | 0.050                   | 0.705          |
| Serum insulin (μU/ml)           | -0.350                  | 0.006          |
| HOMA-IR                         | -0.363                  | 0.004          |

BMI, body mass index; BNP, B-type natriuretic peptide; HOMA-IR, homeostasis model assessment-estimated insulin resistance. A statistical analysis was performed by the Spearman's rank correlation coefficient.

There were no significant correlations of plasma BNP levels with systolic and diastolic blood pressure, FPG and HbA1c. Plasma BNP levels were significantly and

1  
2  
3  
4  
5  
6 inversely correlated with BMI, waist circumference, serum insulin levels and  
7  
8  
9 HOMA-IR, and were positively correlated with age. Significant correlations of plasma  
10  
11  
12 BNP levels with serum insulin ( $\beta=-0.204$ ,  $p=0.119$ ) and HOMA-IR ( $\beta=-0.271$ ,  
13  
14  $p=0.129$ ) were lost after adjusting for PAL.

15  
16  
17  
18 To further understand the associations of plasma BNP levels with insulin  
19  
20 resistance, we examined the differences in serum insulin levels and HOMA-IR between  
21  
22 high-BNP group and low-BNP group (**Figure 2**). Serum insulin levels (mean  $\pm$  SD, 8.1  
23  
24  $\pm$  6.4 U/ml) in high-BNP group were significantly lower than those (11.2  $\pm$  7.4 U/ml) in  
25  
26 low-BNP group. HOMA-IR (2.4  $\pm$  1.9) in high-BNP group were also significantly lower  
27  
28 than those (3.7  $\pm$  3.0) in low-BNP group. We also analyzed the relationship between  
29  
30 quartiles of plasma BNP versus serum insulin and HOMA-IR (Figure 3). We found a  
31  
32 significant influence of plasma BNP on both serum insulin ( $p=0.018$  by the  
33  
34 Kruskal-Wallis ANOVA) and HOMA-IR ( $p=0.018$ ). Serum insulin level in the highest  
35  
36 plasma BNP quartile was significantly lower than in the lowest plasma BNP quartile.  
37  
38 HOMA-IR in the highest plasma BNP quartile was also significantly lower than in the  
39  
40 lowest plasma BNP quartile.

41  
42  
43  
44  
45  
46  
47  
48  
49  
50  
51  
52  
53 The mean  $\pm$  SD of plasma BNP levels in patients with type 2 diabetes (13 men  
54  
55 and 18 women), IFG (5 men and 9 women) and IGT (10 men and 5 women) were 14.3  
56  
57  
58  
59  
60

1  
2  
3  
4  
5  
6 ± 13.5 pg/ml, 12.9 ± 17.2 pg/ml and 14.5 ± 15.1 pg/ml, respectively. The mean ± SD of  
7  
8  
9 PAL in patients with type 2 diabetes, IFG and IGT were 1.66 ± 0.22, 1.65 ± 0.15 and  
10  
11 1.66 ± 0.20, respectively. There were no significant differences in plasma BNP levels  
12  
13 and PAL among patients with type 2 diabetes, IFG and IGT.  
14  
15  
16  
17  
18  
19

## 20 DISCUSSION

21  
22  
23 Recent cross-sectional studies reported that plasma BNP or NT-proBNP levels were  
24  
25 inversely associated with visceral fat,<sup>23</sup> BMI, waist circumference and serum insulin  
26  
27 levels.<sup>9 10</sup> However, the effect of daily physical activity on plasma BNP levels remains  
28  
29 unknown. Previous cross-sectional studies have not ever been performed by using  
30  
31 individuals with glucose intolerance as our study participants. In the present study, we  
32  
33 examined the correlation of daily physical activity measured objectively by a triaxial  
34  
35 accelerometer with plasma BNP levels, in patients with prediabetes and early untreated  
36  
37 type 2 diabetes.  
38  
39  
40  
41  
42  
43  
44

45  
46 Present study demonstrates a significant and positive association between daily  
47  
48 physical activity and plasma BNP levels, and also an inverse association of plasma BNP  
49  
50 levels with BMI, waist circumference, serum insulin levels and HOMA-IR. Previous  
51  
52 studies reported that exercise such as bicycle and hand-grip exercise acutely increase  
53  
54  
55  
56  
57  
58  
59  
60

1  
2  
3  
4  
5  
6 plasma BNP levels with exercise intensity in healthy individuals.<sup>13 14</sup> However, the  
7  
8  
9 effect of daily physical activity on plasma BNP levels remains unknown. It is  
10  
11  
12 noteworthy that we could observe a significant effect of low-intensity daily physical  
13  
14 activity, including walking, dishwashing and washing clothes, defined as NEAT,<sup>15</sup> on plasma  
15  
16 BNP levels. Chainani-Wu N, et al. previously conducted a nested prospective cohort  
17  
18 study of a lifestyle intervention, to understand the effects of lifestyle on BNP. They  
19  
20  
21 observed the change in BNP for 3 months was significantly associated with the change  
22  
23 in exercise score, even after controlling the percentage of change in BMI, which agreed  
24  
25  
26 with a significant and positive correlation between PAL and plasma BNP levels after  
27  
28  
29 adjustment by age and BMI in our study. At 3 months in their study, they found an  
30  
31  
32 inverse association of the change in BNP with the changes in BMI and insulin,<sup>24</sup>  
33  
34  
35 suggesting a significant association between BNP and insulin resistance.  
36  
37  
38

39  
40  
41 An inverse association between natriuretic peptide and obesity and/or insulin  
42  
43 resistance has been established.<sup>8-10 23 25 26</sup> However, controversy exists as to this  
44  
45  
46 association. Lower natriuretic peptide levels in obese individuals has been reported to  
47  
48  
49 be due to increased clearance by the natriuretic peptide receptors (NPR)-C abundantly  
50  
51  
52 expressed in adipose tissue, and also due to decreased natriuretic peptide release from  
53  
54  
55 the heart.<sup>27-29</sup> BNP binds to NPR on adipose tissue and stimulate lipolysis,<sup>30</sup> regulates  
56  
57  
58  
59  
60

1  
2  
3  
4  
5  
6 adipose tissue by activation of proliferator-activated receptor gamma (PPAR $\gamma$ ) gene  
7  
8 expression<sup>31</sup> and increases adiponectin secretion,<sup>32</sup> which improves insulin resistance.

9  
10  
11 Evidences for the association of glucose intolerance with BNP are very limited. A  
12  
13 previous study reported that diabetes was significantly associated with low plasma BNP  
14  
15 levels (adjusted OR 1.51 (1.00 to 2.27) for men; adjusted OR 1.95 (1.26 to 3.02) for  
16  
17 women).<sup>8</sup> However, the underlying mechanisms for low BNP levels in patients with  
18  
19 impaired glucose metabolism remain unknown. In present study, PAL was positively  
20  
21 correlated with plasma BNP levels, which was inversely correlated with the marker for  
22  
23 insulin resistance. Furthermore, serum insulin levels and HOMA-IR were significantly  
24  
25 lower in high-BNP group as compared with those in low-BNP group. BMI and waist  
26  
27 circumference were also correlated with plasma BNP levels. Increased PAL may be  
28  
29 associated with reduction of BMI and waist circumference, which improves insulin  
30  
31 resistance and induce elevation of plasma BNP, due to decreased clearance by NPR-C  
32  
33 abundantly expressed in adipose tissue. Otherwise, increased plasma BNP may  
34  
35 ameliorate insulin resistance through various mechanisms, such as reduced oxidative  
36  
37 stress,<sup>33</sup> decreased systemic inflammation,<sup>34</sup> stimulated lipolysis,<sup>30</sup> activation of PPAR $\gamma$   
38  
39 gene expression and increased adiponectin secretion.<sup>31 32</sup> Recently, increased plasma  
40  
41 BNP levels and/or biological activity could also improve insulin resistance by  
42  
43  
44  
45  
46  
47  
48  
49  
50  
51  
52  
53  
54  
55  
56  
57  
58  
59  
60

1  
2  
3  
4  
5  
6 increasing mitochondrial fat oxidative capacity in white and brown fat, as well as in  
7  
8 skeletal muscle.<sup>35 36</sup> However, the cardiac ejection fraction is also inversely related  
9  
10 with plasma BNP levels but is not beneficial,<sup>2-7</sup> and plasma BNP levels are reported to  
11  
12 increase lipolysis,<sup>37</sup> and to be positively associated insulin resistance.<sup>38</sup> The  
13  
14  
15  
16  
17  
18 relationships among PAL, BNP and insulin resistance in impaired glucose metabolism  
19  
20 remain largely unknown. We should perform further studies, preferably using a greater  
21  
22  
23  
24 number of patients with glucose intolerance.

25  
26  
27  
28  
29  
30  
31  
32  
33  
34  
35  
36  
37  
38  
39  
40  
41  
42  
43  
44  
45  
46  
47  
48  
49  
50  
51  
52  
53  
54  
55  
56  
57  
58  
59  
60

There are several limitations that need to be considered when interpreting the results of this study. This is a cross-sectional study, limiting inferences of causality and its direction. Although we controlled for some confounding factors (age, sex, BMI, engagement in sports-like exercise or resistance training, and medication), other factors such as genetic variation were not taken into account. Furthermore, we studied only patients with IFG, IGT and type 2 diabetes, therefore, our conclusions cannot apply to healthy populations. A heterogeneous group of individuals with IFG, IGT and type 2 diabetes was examined. We could not mention that the associations between BNP and physical activity or insulin resistance were the same in three groups. We will study these associations, by using a great number of patients with each type of glucose intolerance, in the future. The triaxial accelerometer is an extensively validated device for evaluating

1  
2  
3  
4  
5  
6 physical activity under free living conditions,<sup>39-41</sup> however, Leenders et al indicated that  
7  
8  
9 the predictive equations based on the relationship between acceleration and energy  
10  
11  
12 expenditure (EE) during locomotive movements led to under- and overestimation of  
13  
14  
15 TEE.<sup>42</sup> It is possible that EE and PAL assessed by a triaxial accelerometer differ from  
16  
17  
18 the true amounts of EE and PAL.

19  
20  
21 In conclusion, we found a significant and positive association between PAL and  
22  
23  
24 plasma BNP levels in patients with prediabetes and early untreated type 2 diabetes.  
25  
26  
27 Plasma BNP levels were inversely associated with insulin resistance. Our findings  
28  
29  
30 propose the possibility that BNP could be increased by daily physical activity and  
31  
32  
33 plasma BNP is beneficially associated with insulin resistance.  
34  
35  
36  
37

### 38 **Contributors**

39  
40  
41 The study was carried out in collaboration between all authors. HH, HY and OE  
42  
43  
44 conceived and designed the study. HH and MN performed the study. HH, HY and MK  
45  
46  
47 analyzed the data, interpreted the results and wrote the manuscript. HH and HY also  
48  
49  
50 discussed analyses, interpretation, presentation and participated in drafting the  
51  
52  
53 manuscript.  
54  
55  
56  
57  
58  
59  
60



**Funding**

This study was supported by a grant from the National Center for Global Health and Medicine (25-203).

**Competing interests**

The authors declare that there are no conflicts of interest.

**Ethics approval**

The study was approved by the Medical Ethics Committee of National Center for Global Health and Medicine (reference number NCGM-G-001212).

**Provenance and peer review**

Not commissioned; externally peer reviewed.

**Data sharing statement**

No additional data are available.

**REFERENCES**

- 1  
2  
3  
4  
5  
6 1. Gardner DG, Chen S, Glenn DJ, Grigsby CL. Molecular biology of the natriuretic  
7  
8 peptide system: implications for physiology and hypertension. *Hypertension*  
9  
10 2007;49:419-26.  
11
- 12  
13  
14 2. Maeda K, Tsutamoto T, Wada A, et al. High levels of plasma brain natriuretic  
15  
16 peptide and interleukin-6 after optimized treatment for heart failure are independent risk  
17  
18 factors for morbidity and mortality in patients with congestive heart failure. *J Am Coll*  
19  
20 *Cardiol* 2000;36:1587-93.  
21  
22
- 23  
24  
25 3. Wang TJ, Larson MG, Levy D, et al. Plasma natriuretic peptide levels and the risk of  
26  
27 cardiovascular events and death. *N Engl J Med* 2004;350:655-63.  
28  
29
- 30  
31  
32 4. Alehagen U, Lindstedt G, Levin LA, Dahlström U. Risk of cardiovascular death in  
33  
34 elderly patients with possible heart failure. B-type natriuretic peptide (BNP) and the  
35  
36 aminoterminal fragment of ProBNP (N-terminal proBNP) as prognostic indicators in a  
37  
38 6-year follow-up of a primary care population. *Int J Cardiol* 2005;100:125-33.  
39  
40
- 41  
42  
43 5. Kroon MH, van den Hurk K, Alsema M, et al. Prospective associations of B-type  
44  
45 natriuretic peptide with markers of left ventricular function in individuals with and  
46  
47 without type 2 diabetes: an 8-year follow-up of the Hoorn Study. *Diabetes Care*  
48  
49 2012;35:2510-14.  
50  
51
- 52  
53  
54 6. Olsen MH, Wachtell K, Tuxen C, et al. N-terminal pro-brain natriuretic peptide  
55  
56  
57  
58  
59  
60

1  
2  
3  
4  
5  
6 predicts cardiovascular events in patients with hypertension and left ventricular  
7  
8 hypertrophy: a LIFE study. *J Hypertens* 2004;22:1597-604.

9  
10  
11 7. Schirmer H, Omland T. Circulating N-terminal pro-atrial natriuretic peptide is an  
12  
13 independent predictor of left ventricular hypertrophy in the general population. The  
14  
15 Tromsø Study. *Eur Heart J* 1999;20:755-63.

16  
17  
18 8. Wang TJ, Larson MG, Levy D, et al. Impact of obesity on plasma natriuretic peptide  
19  
20 levels. *Circulation* 2004;109:594-600.

21  
22  
23 9. Koizumi M, Watanabe H, Kaneko Y, et al. Impact of obesity on plasma B-type  
24  
25 natriuretic peptide levels in Japanese community-based subjects. *Heart Vessels* 2012;  
26  
27 27:287-294.

28  
29  
30 10. Olsen MH, Hansen TW, Christensen MK, et al. N-terminal pro brain natriuretic  
31  
32 peptide is inversely related to metabolic cardiovascular risk factors and the metabolic  
33  
34 syndrome. *Hypertension* 2005, 46:660-6.

35  
36  
37 11. Hamilton MT, Hamilton DG, Zderic TW. Role of low energy expenditure and sitting  
38  
39 in obesity, metabolic syndrome, type 2 diabetes, and cardiovascular disease. *Diabetes*  
40  
41 2007;56:2655-67.

42  
43  
44 12. Avery L, Flynn D, van Wersch A, Sniehotta FF, Trenell MI. Changing physical  
45  
46 activity behavior in type 2 diabetes: a systematic review and meta-analysis of behavioral  
47  
48  
49  
50  
51  
52  
53  
54  
55  
56  
57  
58  
59  
60

1  
2  
3  
4  
5  
6 interventions. *Diabetes Care* 2012;35:2681-89.

7  
8  
9 13. Barletta G, Stefani L, Del Bene R, et al. Effects of exercise on natriuretic peptides  
10  
11 and cardiac function in man. *Int J Cardiol* 1998;65:217-25.

12  
13  
14 14. Nielsen HB, De Palo EF, Meneghetti M, Madsen PL, Ihlemann N, Secher NH.  
15  
16 Circulating immunoreactive proANP1-30 and proANP31-67 responses to acute exercise.  
17  
18  
19  
20  
21 *Regul Pept* 2001;99:203-7.

22  
23 15. Levine JA. Non-exercise activity thermogenesis (NEAT). *Nutr Rev* 2004;62:S82-97.

24  
25  
26 16. American Diabetes Association. Diagnosis and classification of diabetes mellitus.  
27  
28  
29  
30  
31 *Diabetes Care* 2010;33:S62-9.

32  
33 17. Oshima Y, Kawaguchi K, Tanaka S, et al. Classifying household and locomotive  
34  
35 activities using a triaxial accelerometer. *Gait Posture* 2010;31:370-4.

36  
37  
38 18. Ohkawara K, Oshima Y, Hikiyama Y, Ishikawa-Takata K, Tabata I, Tanaka S.  
39  
40  
41  
42  
43  
44  
45 Real-time estimation of daily physical activity intensity by a triaxial accelerometer and  
46  
47 a gravity-removal classification algorithm. *Br J Nutr* 2011;105:1681-91.

48  
49  
50 19. Ganpule AA, Tanaka S, Ishikawa-Takata K, Tabata I. Interindividual variability in  
51  
52  
53  
54  
55  
56 sleeping metabolic rate in Japanese subjects. *Eur J Clin Nutr* 2007;61:1256-61.

57  
58  
59 20. Energy and protein requirements. Report of a joint FAO/WHO/UNU Expert  
60  
61  
62  
63  
64  
65  
66  
67  
68  
69  
70  
71  
72  
73  
74  
75  
76  
77  
78  
79  
80  
81  
82  
83  
84  
85  
86  
87  
88  
89  
90  
91  
92  
93  
94  
95  
96  
97  
98  
99  
100  
101  
102  
103  
104  
105  
106  
107  
108  
109  
110  
111  
112  
113  
114  
115  
116  
117  
118  
119  
120  
121  
122  
123  
124  
125  
126  
127  
128  
129  
130  
131  
132  
133  
134  
135  
136  
137  
138  
139  
140  
141  
142  
143  
144  
145  
146  
147  
148  
149  
150  
151  
152  
153  
154  
155  
156  
157  
158  
159  
160  
161  
162  
163  
164  
165  
166  
167  
168  
169  
170  
171  
172  
173  
174  
175  
176  
177  
178  
179  
180  
181  
182  
183  
184  
185  
186  
187  
188  
189  
190  
191  
192  
193  
194  
195  
196  
197  
198  
199  
200  
201  
202  
203  
204  
205  
206  
207  
208  
209  
210  
211  
212  
213  
214  
215  
216  
217  
218  
219  
220  
221  
222  
223  
224  
225  
226  
227  
228  
229  
230  
231  
232  
233  
234  
235  
236  
237  
238  
239  
240  
241  
242  
243  
244  
245  
246  
247  
248  
249  
250  
251  
252  
253  
254  
255  
256  
257  
258  
259  
260  
261  
262  
263  
264  
265  
266  
267  
268  
269  
270  
271  
272  
273  
274  
275  
276  
277  
278  
279  
280  
281  
282  
283  
284  
285  
286  
287  
288  
289  
290  
291  
292  
293  
294  
295  
296  
297  
298  
299  
300  
301  
302  
303  
304  
305  
306  
307  
308  
309  
310  
311  
312  
313  
314  
315  
316  
317  
318  
319  
320  
321  
322  
323  
324  
325  
326  
327  
328  
329  
330  
331  
332  
333  
334  
335  
336  
337  
338  
339  
340  
341  
342  
343  
344  
345  
346  
347  
348  
349  
350  
351  
352  
353  
354  
355  
356  
357  
358  
359  
360  
361  
362  
363  
364  
365  
366  
367  
368  
369  
370  
371  
372  
373  
374  
375  
376  
377  
378  
379  
380  
381  
382  
383  
384  
385  
386  
387  
388  
389  
390  
391  
392  
393  
394  
395  
396  
397  
398  
399  
400  
401  
402  
403  
404  
405  
406  
407  
408  
409  
410  
411  
412  
413  
414  
415  
416  
417  
418  
419  
420  
421  
422  
423  
424  
425  
426  
427  
428  
429  
430  
431  
432  
433  
434  
435  
436  
437  
438  
439  
440  
441  
442  
443  
444  
445  
446  
447  
448  
449  
450  
451  
452  
453  
454  
455  
456  
457  
458  
459  
460  
461  
462  
463  
464  
465  
466  
467  
468  
469  
470  
471  
472  
473  
474  
475  
476  
477  
478  
479  
480  
481  
482  
483  
484  
485  
486  
487  
488  
489  
490  
491  
492  
493  
494  
495  
496  
497  
498  
499  
500  
501  
502  
503  
504  
505  
506  
507  
508  
509  
510  
511  
512  
513  
514  
515  
516  
517  
518  
519  
520  
521  
522  
523  
524  
525  
526  
527  
528  
529  
530  
531  
532  
533  
534  
535  
536  
537  
538  
539  
540  
541  
542  
543  
544  
545  
546  
547  
548  
549  
550  
551  
552  
553  
554  
555  
556  
557  
558  
559  
560  
561  
562  
563  
564  
565  
566  
567  
568  
569  
570  
571  
572  
573  
574  
575  
576  
577  
578  
579  
580  
581  
582  
583  
584  
585  
586  
587  
588  
589  
590  
591  
592  
593  
594  
595  
596  
597  
598  
599  
600  
601  
602  
603  
604  
605  
606  
607  
608  
609  
610  
611  
612  
613  
614  
615  
616  
617  
618  
619  
620  
621  
622  
623  
624  
625  
626  
627  
628  
629  
630  
631  
632  
633  
634  
635  
636  
637  
638  
639  
640  
641  
642  
643  
644  
645  
646  
647  
648  
649  
650  
651  
652  
653  
654  
655  
656  
657  
658  
659  
660  
661  
662  
663  
664  
665  
666  
667  
668  
669  
670  
671  
672  
673  
674  
675  
676  
677  
678  
679  
680  
681  
682  
683  
684  
685  
686  
687  
688  
689  
690  
691  
692  
693  
694  
695  
696  
697  
698  
699  
700  
701  
702  
703  
704  
705  
706  
707  
708  
709  
710  
711  
712  
713  
714  
715  
716  
717  
718  
719  
720  
721  
722  
723  
724  
725  
726  
727  
728  
729  
730  
731  
732  
733  
734  
735  
736  
737  
738  
739  
740  
741  
742  
743  
744  
745  
746  
747  
748  
749  
750  
751  
752  
753  
754  
755  
756  
757  
758  
759  
760  
761  
762  
763  
764  
765  
766  
767  
768  
769  
770  
771  
772  
773  
774  
775  
776  
777  
778  
779  
780  
781  
782  
783  
784  
785  
786  
787  
788  
789  
790  
791  
792  
793  
794  
795  
796  
797  
798  
799  
800  
801  
802  
803  
804  
805  
806  
807  
808  
809  
810  
811  
812  
813  
814  
815  
816  
817  
818  
819  
820  
821  
822  
823  
824  
825  
826  
827  
828  
829  
830  
831  
832  
833  
834  
835  
836  
837  
838  
839  
840  
841  
842  
843  
844  
845  
846  
847  
848  
849  
850  
851  
852  
853  
854  
855  
856  
857  
858  
859  
860  
861  
862  
863  
864  
865  
866  
867  
868  
869  
870  
871  
872  
873  
874  
875  
876  
877  
878  
879  
880  
881  
882  
883  
884  
885  
886  
887  
888  
889  
890  
891  
892  
893  
894  
895  
896  
897  
898  
899  
900  
901  
902  
903  
904  
905  
906  
907  
908  
909  
910  
911  
912  
913  
914  
915  
916  
917  
918  
919  
920  
921  
922  
923  
924  
925  
926  
927  
928  
929  
930  
931  
932  
933  
934  
935  
936  
937  
938  
939  
940  
941  
942  
943  
944  
945  
946  
947  
948  
949  
950  
951  
952  
953  
954  
955  
956  
957  
958  
959  
960  
961  
962  
963  
964  
965  
966  
967  
968  
969  
970  
971  
972  
973  
974  
975  
976  
977  
978  
979  
980  
981  
982  
983  
984  
985  
986  
987  
988  
989  
990  
991  
992  
993  
994  
995  
996  
997  
998  
999  
1000

- 1  
2  
3  
4  
5  
6 21. Matthews DR, Hosker JP, Rudenski AS, Naylor BA, Treacher DF, Turner RC.  
7  
8 Homeostasis model assessment: insulin resistance and beta-cell function from fasting  
9  
10 plasma glucose and insulin concentrations in man. *Diabetologia* 1985;28:412-419.  
11  
12  
13  
14 22. Mongia SK, La'ulu SL, Apple FS, Ler R, Murakami MM, Roberts WL. Performance  
15  
16 characteristics of the Architect brain natriuretic peptide (BNP) assay: a two site study.  
17  
18  
19  
20  
21 *Clin Chim Acta* 2008;391:102-5.  
22  
23  
24 23. Neeland IJ, Winders BR, Ayers CR, et al. Higher natriuretic peptide levels associate  
25  
26 with a favorable adipose tissue distribution profile. *J Am Coll Cardiol* 2013;62:752-60.  
27  
28  
29 24. Chainani-Wu N, Weidner G, Purnell DM, et al. Relation of B-type natriuretic  
30  
31 peptide levels to body mass index after comprehensive lifestyle changes. *Am J Cardiol*  
32  
33  
34  
35 2010;105:1570-6.  
36  
37  
38 25. Mehra MR, Uber PA, Park MH, et al. Obesity and suppressed B-type natriuretic  
39  
40 peptide levels in heart failure. *J Am Coll Cardiol* 2004;43:1590-5.  
41  
42  
43 26. McCord J, Mundy BJ, Hudson MP, et al. Relationship between obesity and B-type  
44  
45 natriuretic peptide levels. *Arch Intern Med* 2004;164:2247-52.  
46  
47  
48  
49 27. Dessì-Fulgheri P, Sarzani R, Tamburrini P, et al. Plasma atrial natriuretic peptide and  
50  
51 natriuretic peptide receptor gene expression in adipose tissue of normotensive and  
52  
53  
54  
55 hypertensive obese patients. *J Hypertens* 1997;15:1695-9.  
56  
57  
58  
59  
60

- 1  
2  
3  
4  
5  
6 28. Das SR, Drazner MH, Dries DL, et al. Impact of body mass and body composition  
7  
8 on circulating levels of natriuretic peptides: results from the Dallas Heart Study.  
9  
10 *Circulation* 2005;112:2163-8.  
11  
12  
13  
14 29. Costello-Boerrigter LC, Burnett JC Jr. A new role for the natriuretic peptides:  
15  
16 metabolic regulators of the adipocyte. *J Am Coll Cardiol* 2009;53:2078-9.  
17  
18  
19  
20 30. Sengenès C, Berlan M, De Glisezinski I, Lafontan M, Galitzky J. Natriuretic  
21  
22 peptides: a new lipolytic pathway in human adipocytes. *FASEB J* 2000;14:1345-51.  
23  
24  
25  
26 31. Miyashita K, Itoh H, Tsujimoto H, et al. Natriuretic  
27  
28 peptides/cGMP/cGMP-dependent protein kinase cascades promote muscle  
29  
30 mitochondrial biogenesis and prevent obesity. *Diabetes* 2009;58:2880-92.  
31  
32  
33  
34 32. Tsukamoto O, Fujita M, Kato M, et al. Natriuretic peptides enhance the production  
35  
36 of adiponectin in human adipocytes and in patients with chronic heart failure. *J Am Coll*  
37  
38 *Cardiol* 2009;53:2070-7.  
39  
40  
41  
42  
43 33. Rajagopalan S, Kurz S, Münzel T, et al. Angiotensin II-mediated hypertension in the  
44  
45 rat increases vascular superoxide production via membrane NADH/NADPH oxidase  
46  
47 activation. Contribution to alterations of vasomotor tone. *J Clin Invest*  
48  
49  
50  
51 1996;97:1916-23.  
52  
53  
54  
55 34. Moro C, Klimcakova E, Lolmède K, et al. Atrial natriuretic peptide inhibits the  
56  
57  
58  
59  
60

1  
2  
3  
4  
5  
6 production of adipokines and cytokines linked to inflammation and insulin resistance in  
7  
8  
9 human subcutaneous adipose tissue. *Diabetologia* 2007;50:1038-47.

10  
11 35. [Bordicchia M, Liu D, Amri EZ, et al. Cardiac natriuretic peptides act via p38 MAPK](#)  
12 [to induce the brown fat thermogenic program in mouse and human adipocytes. \*J Clin\*](#)  
13 [\*Invest\* 2012;122:1022-36.](#)

14  
15  
16  
17 36. [Engeli S, Birkenfeld AL, Badin PM, et al. Natriuretic peptides enhance the oxidative](#)  
18 [capacity of human skeletal muscle. \*J Clin Invest\* 2012;122:4675-9.](#)

19  
20  
21 37. [Polak J, Kotrc M, Wedellova Z, et al. Lipolytic effects of B-type natriuretic peptide](#)  
22 [1-32 in adipose tissue of heart failure patients compared with healthy controls. \*J Am\*](#)  
23 [\*Coll Cardiol\* 2011;58:1119-25.](#)

24  
25  
26 38. [Tekes S, Cikim AS. The association of brain natriuretic peptide and insulin](#)  
27 [resistance in obesity-related hypertension. \*J Hum Hypertens\* 2007;21:546-50.](#)

28  
29  
30 39. Plasqui G, Bonomi AG, Westerterp KR. Daily physical activity assessment with  
31 [accelerometers: new insights and validation studies. \*Obes Rev\* 2013;14:451-62.](#)

32  
33  
34 40. Midorikawa T, Tanaka S, Kaneko K, et al. Evaluation of low-intensity physical  
35 [activity by triaxial accelerometry. \*Obesity\* 2007;15:3031-8.](#)

36  
37  
38 41. Ekelund U, Sjöström M, Yngve A, et al. Physical activity assessed by activity  
39 [monitor and doubly labeled water in children. \*Med Sci Sports Exerc\* 2001;33:275-81.](#)

1  
2  
3  
4  
5  
6 42. Leenders NY, Sherman WM, Nagaraja HN. Energy expenditure estimated by  
7  
8  
9 accelerometry and doubly labeled water: do they agree? *Med Sci Sports Exerc*  
10  
11  
12 2006;38:2165-72.  
13  
14  
15  
16  
17  
18  
19  
20  
21  
22  
23  
24  
25  
26  
27  
28  
29  
30  
31  
32  
33  
34  
35  
36  
37  
38  
39  
40  
41  
42  
43  
44  
45  
46  
47  
48  
49  
50  
51  
52  
53  
54  
55  
56  
57  
58  
59  
60

For peer review only



(figure legends)

**Figure 1** Correlation of physical activity level and plasma BNP levels in 60 subjects.

r indicates correlation coefficient analyzed by the Spearman's rank correlation coefficient.

**Figure 2** Serum insulin levels (A) and homeostatic model assessment-estimated insulin resistance (HOMA-IR) (B) in high-BNP group (n = 30) and low-BNP group (n = 30).

Data are mean values±SD. We divided subjects into high-BNP group ( $\geq 8.0$  pg/ml) and low-BNP group ( $< 8.0$  pg/ml) by the median values of BNP. Differences in serum insulin levels and HOMA-IR between high-BNP group and low-BNP group were analyzed by the Mann-Whitney U test.

**Figure 3** Serum insulin levels (A) and homeostatic model assessment-estimated insulin resistance (HOMA-IR) (B) in each plasma BNP quartiles. Q1 is the lowest quartile and

Q4 is the highest quartile. Boxes indicate medians and quartiles; whiskers indicate the lowest and highest values. We found a significant influence of plasma BNP on both serum insulin (p=0.018 by the Kruskal-Wallis ANOVA) and HOMA-IR (p=0.018). The difference between Q1 and Q2-4 was statistically analyzed by the Scheffe's F Test.

1  
2  
3  
4  
5  
6  
7  
8  
9  
10  
11  
12  
13  
14  
15  
16  
17  
18  
19  
20  
21  
22  
23  
24  
25  
26  
27  
28  
29  
30  
31  
32  
33  
34  
35  
36  
37  
38  
39  
40  
41  
42  
43  
44  
45  
46  
47  
48  
49  
50  
51  
52  
53  
54  
55  
56  
57  
58  
59  
60

For peer review only

1  
2  
3  
4  
5  
6  
7  
8  
9  
10  
11  
12  
13  
14  
15  
16  
17  
18  
19  
20  
21  
22  
23  
24  
25  
26  
27  
28  
29  
30  
31  
32  
33  
34  
35  
36  
37  
38  
39  
40  
41  
42  
43  
44  
45  
46  
47  
48  
49  
50  
51  
52  
53  
54  
55  
56  
57  
58  
59  
60

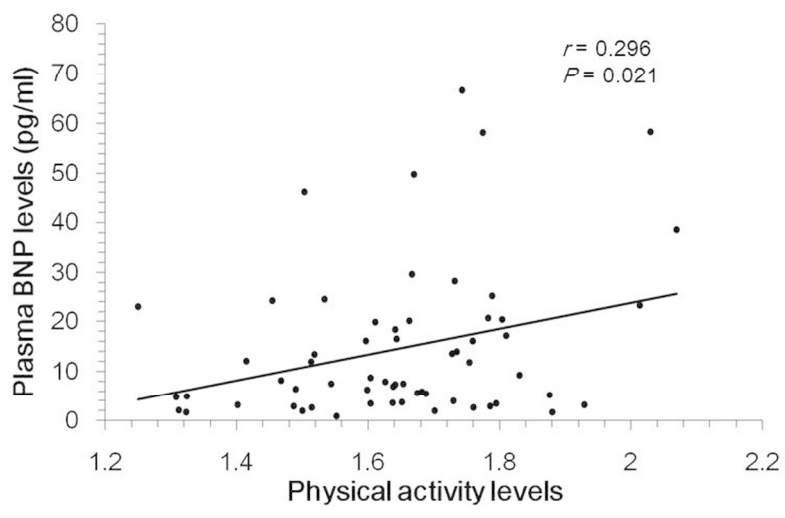

119x90mm (300 x 300 DPI)

ew only

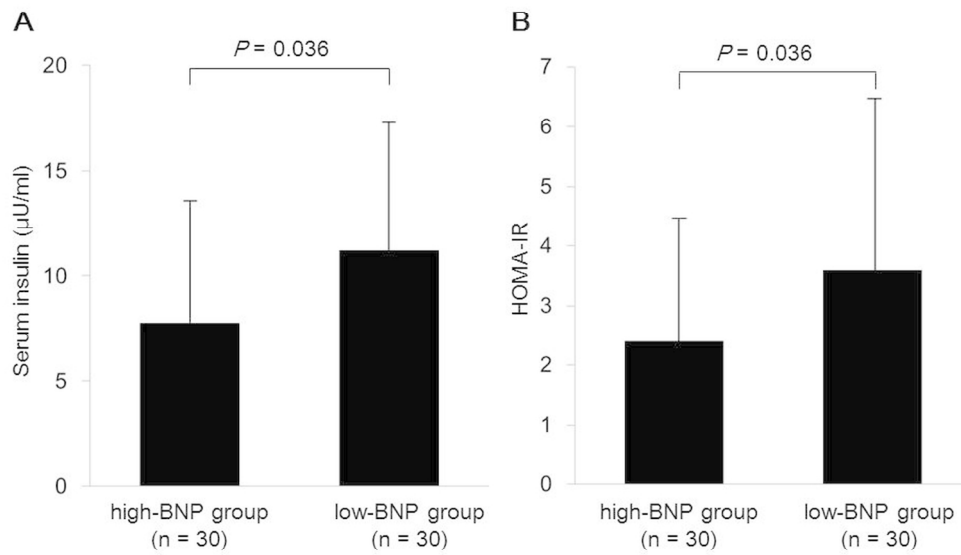

119x90mm (300 x 300 DPI)

1  
2  
3  
4  
5  
6  
7  
8  
9  
10  
11  
12  
13  
14  
15  
16  
17  
18  
19  
20  
21  
22  
23  
24  
25  
26  
27  
28  
29  
30  
31  
32  
33  
34  
35  
36  
37  
38  
39  
40  
41  
42  
43  
44  
45  
46  
47  
48  
49  
50  
51  
52  
53  
54  
55  
56  
57  
58  
59  
60

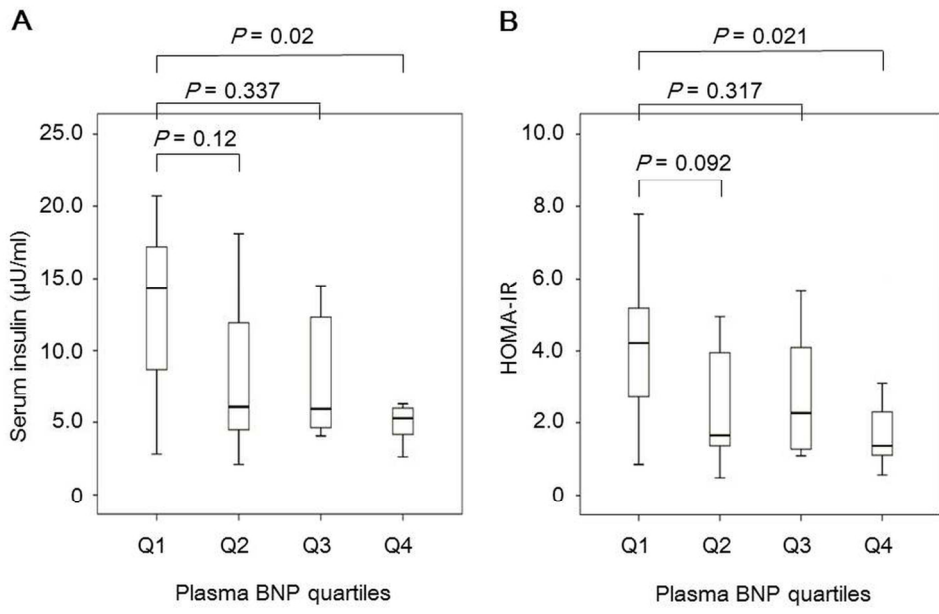

119x90mm (300 x 300 DPI)

Review only

# BMJ Open

## The association between daily physical activity and plasma B-type natriuretic peptide in patients with glucose intolerance: a cross-sectional study

|                                 |                                                                                                                                                                                                                                                                                                                                                                                                                                            |
|---------------------------------|--------------------------------------------------------------------------------------------------------------------------------------------------------------------------------------------------------------------------------------------------------------------------------------------------------------------------------------------------------------------------------------------------------------------------------------------|
| Journal:                        | <i>BMJ Open</i>                                                                                                                                                                                                                                                                                                                                                                                                                            |
| Manuscript ID:                  | bmjopen-2014-006276.R2                                                                                                                                                                                                                                                                                                                                                                                                                     |
| Article Type:                   | Research                                                                                                                                                                                                                                                                                                                                                                                                                                   |
| Date Submitted by the Author:   | 16-Dec-2014                                                                                                                                                                                                                                                                                                                                                                                                                                |
| Complete List of Authors:       | Hamasaki, Hidetaka; National Center for Global Health and Medicine Kohnodai Hospital, Department of Internal Medicine<br>Yanai, Hidekatsu; National Center for Global Health and Medicine Kohnodai Hospital, Department of Internal Medicine<br>Kakei, Masafumi; Jichi Medical University School of Medicine, Noda, Mitsuhiro; Center Hospital, National Center for Global Health and Medicine,<br>Ezaki, Osamu; Showa Women's University, |
| <b>Primary Subject Heading</b>: | Diabetes and endocrinology                                                                                                                                                                                                                                                                                                                                                                                                                 |
| Secondary Subject Heading:      | Diabetes and endocrinology                                                                                                                                                                                                                                                                                                                                                                                                                 |
| Keywords:                       | DIABETES & ENDOCRINOLOGY, SPORTS MEDICINE, PUBLIC HEALTH                                                                                                                                                                                                                                                                                                                                                                                   |
|                                 |                                                                                                                                                                                                                                                                                                                                                                                                                                            |

SCHOLARONE™  
Manuscripts

**Research****The association between daily physical activity and plasma B-type natriuretic peptide in patients with glucose intolerance: a cross-sectional study**

Hidetaka Hamasaki,<sup>1,2</sup> Hidekatsu Yanai,<sup>1</sup> Masafumi Kakei,<sup>2</sup> Mitsuhiro Noda,<sup>3</sup> Osamu Ezaki<sup>4</sup>

<sup>1</sup> Department of Internal Medicine, National Center for Global Health and Medicine Kohnodai Hospital, Chiba, Japan.

<sup>2</sup> Division of Complementary Medicine, First Department of General Medicine, Saitama Medical Center, Jichi Medical University School of Medicine, Saitama, Japan.

<sup>3</sup> Department of Diabetes and Metabolic Medicine, Center Hospital, National Center for Global Health and Medicine, Tokyo, Japan.

<sup>4</sup> Department of Human Health and Design, Faculty of Human Life and Environmental Sciences, Showa Women's University, Tokyo, Japan.

**Correspondence to**

1  
2  
3  
4  
5  
6 Hidekatsu Yanai, MD, PhD, FACP, Department of Internal Medicine, National Center  
7  
8  
9 for Global Health and Medicine Kohnodai Hospital, 1-7-1 Kohnodai, Chiba 272-8516,  
10  
11 Japan. E-mail: dyanai@hospk.ncgm.go.jp; Telephone: +81-47-372-3501; Fax:  
12  
13 +81-47-372-1858  
14  
15  
16  
17  
18  
19  
20  
21  
22

23 **Keywords:** B-type natriuretic peptide; glucose intolerance; insulin resistance; physical  
24  
25 activity; type 2 diabetes  
26  
27  
28  
29  
30  
31  
32

33 **Word count:** 2,732 words  
34  
35  
36  
37  
38  
39  
40  
41  
42  
43  
44  
45  
46  
47  
48  
49  
50  
51  
52  
53  
54  
55  
56  
57  
58  
59  
60



**ABSTRACT**

**Objectives:** In spite of accumulating evidences suggesting an inverse association between insulin resistance and plasma B-type natriuretic peptide (BNP) levels, the effect of daily physical activity on plasma BNP in individuals with glucose intolerance remains unknown. We investigated the association of physical activity level (PAL) with plasma BNP in patients with impaired fasting glucose, impaired glucose tolerance and type 2 diabetes.

**Design:** Cross-sectional study.

**Setting:** Outpatients visiting National Center for Global Health and Medicine Kohnodai Hospital.

**Participants:** A total of 60 patients with glucose intolerance who did not take any hypoglycemic agents, cholesterol lowering agents and antihypertensive agents were recruited. Patients who were diagnosed as having heart failure and renal impairment, engaged in sports-like exercise and resistance training were excluded.

**Primary outcome measures:** PAL was objectively measured by a triaxial accelerometer. The association between PAL and plasma BNP levels was assessed by multiple regression analysis.

**Results:** PAL was positively correlated with plasma BNP levels ( $r=0.296$ ,  $p=0.021$ ).

1  
2  
3  
4  
5  
6 PAL was still significantly correlated with plasma BNP levels after adjustment for age  
7  
8  
9 ( $\beta=0.290$ ,  $p=0.014$ ), and adjustment for age and BMI ( $\beta=0.282$ ,  $p=0.018$ ). Plasma BNP  
10  
11  
12 levels were inversely correlated with serum insulin levels ( $r=-0.350$ ,  $p=0.006$ ) and  
13  
14 homeostasis model assessment-estimated insulin resistance (HOMA-IR) ( $r=-0.363$ ,  
15  
16  $p=0.004$ ). Serum insulin levels (mean  $\pm$  SD,  $8.1 \pm 6.4$   $\mu\text{U/ml}$ ) and HOMA-IR ( $2.4 \pm$   
17  
18  $1.9$ ) in high-BNP group were significantly lower than those ( $11.2 \pm 7.4$   $\mu\text{U/ml}$  and  $3.7 \pm$   
19  
20  $3.0$ , respectively) in low-BNP group.  
21  
22  
23  
24

25  
26 **Conclusions:** Our findings propose the possibility that plasma BNP may be increased  
27  
28  
29 by daily physical activity and BNP is associated with insulin resistance.  
30  
31  
32  
33  
34  
35  
36  
37  
38  
39  
40  
41  
42  
43  
44  
45  
46  
47  
48  
49  
50  
51  
52  
53  
54  
55  
56  
57  
58  
59  
60

### Strengths and limitations of this study

- This study provides novel data: objectively measured light-intensity daily physical activity using a triaxial accelerometer is positively associated with plasma BNP levels in patients with glucose intolerance.
- Our study evaluated precisely an association between daily physical activity and plasma BNP levels, by recruiting drug-naive patients who were not engaged in sports-like exercise.
- Previous studies reported an inverse association between plasma BNP levels and the markers for insulin resistance in healthy subjects. To our knowledge, our study is the first to show a significant association between plasma BNP levels and insulin resistance in patients with glucose intolerance.
- The limitations are the small sample size and the cross-sectional design which does not allow us to establish any causal relationship.
- Even a triaxial accelerometer may lead to under or overestimation of energy expenditure. It can be denied that energy expenditure assessed by a triaxial accelerometer differ from the true amounts.

## INTRODUCTION

B-type natriuretic peptide (BNP) belongs to the cardiac natriuretic peptide family which are released from the heart in response to pressure and volume overload.<sup>1</sup> Plasma BNP and N-terminal proBNP (Nt-proBNP) are increased with the severity of left ventricular dysfunction and/or hypertrophy, therefore, it has become a useful biomarker for diagnosis and prognosis of heart failure with or without type 2 diabetes.<sup>2-7</sup>

Plasma BNP levels have been reported to be inversely related to body mass index (BMI) and waist circumference in individuals without heart failure.<sup>8-9</sup> Very recently, Olsen MH, et al. reported that Nt-proBNP was significantly lower in individuals with the metabolic syndrome as compared with those without the metabolic syndrome.<sup>10</sup> In their study, Nt-proBNP levels were inversely correlated with BMI, waist circumference, serum cholesterol and triglyceride, plasma glucose and insulin, independently of age and gender.<sup>10</sup> These results suggest that BNP is beneficially associated with obesity and obesity-related metabolic disorders.

Low physical activity and sedentary lifestyle induce the development of type 2 diabetes, and also deteriorate glucose control in patients with type 2 diabetes.<sup>11-12</sup> Exercise such as bicycle and hand-grip exercise has been reported to acutely increase plasma BNP levels with exercise intensity, in healthy individuals.<sup>13-14</sup> However, the

1  
2  
3  
4  
5  
6 effect of daily physical activity on plasma BNP levels remain obscure. To our  
7  
8  
9 knowledge, there were no previous studies that investigated the association between  
10  
11  
12 daily physical activity and plasma BNP levels in patients with glucose intolerance.  
13

14  
15 Here, we studied the association of physical activity level (PAL) which was  
16  
17 evaluated objectively by using a triaxial accelerometer, with plasma BNP levels, in  
18  
19 patients with impaired fasting glucose (IFG), impaired glucose tolerance (IGT) and type  
20  
21 2 diabetes. Furthermore, we elucidated the correlations of plasma BNP levels to  
22  
23 metabolic parameters in patients with such glucose intolerance.  
24  
25  
26  
27  
28  
29  
30  
31

## 32 **MATERIAL AND METHODS**

### 33 34 **Study protocol and participants**

35  
36  
37 The study protocol was approved by the Medical Ethics Committee of National Center  
38  
39 for Global Health and Medicine (reference number NCGM-G-001212). We recruited  
40  
41 study participants with glucose intolerance who did not take any hypoglycemic agents  
42  
43 or cholesterol-lowering agents from outpatients who visited the Department of Internal  
44  
45  
46  
47  
48  
49  
50  
51  
52  
53  
54  
55  
56  
57  
58  
59  
60  
61  
62  
63  
64  
65  
66  
67  
68  
69  
70  
71  
72  
73  
74  
75  
76  
77  
78  
79  
80  
81  
82  
83  
84  
85  
86  
87  
88  
89  
90  
91  
92  
93  
94  
95  
96  
97  
98  
99  
100  
101  
102  
103  
104  
105  
106  
107  
108  
109  
110  
111  
112  
113  
114  
115  
116  
117  
118  
119  
120  
121  
122  
123  
124  
125  
126  
127  
128  
129  
130  
131  
132  
133  
134  
135  
136  
137  
138  
139  
140  
141  
142  
143  
144  
145  
146  
147  
148  
149  
150  
151  
152  
153  
154  
155  
156  
157  
158  
159  
160  
161  
162  
163  
164  
165  
166  
167  
168  
169  
170  
171  
172  
173  
174  
175  
176  
177  
178  
179  
180  
181  
182  
183  
184  
185  
186  
187  
188  
189  
190  
191  
192  
193  
194  
195  
196  
197  
198  
199  
200  
201  
202  
203  
204  
205  
206  
207  
208  
209  
210  
211  
212  
213  
214  
215  
216  
217  
218  
219  
220  
221  
222  
223  
224  
225  
226  
227  
228  
229  
230  
231  
232  
233  
234  
235  
236  
237  
238  
239  
240  
241  
242  
243  
244  
245  
246  
247  
248  
249  
250  
251  
252  
253  
254  
255  
256  
257  
258  
259  
260  
261  
262  
263  
264  
265  
266  
267  
268  
269  
270  
271  
272  
273  
274  
275  
276  
277  
278  
279  
280  
281  
282  
283  
284  
285  
286  
287  
288  
289  
290  
291  
292  
293  
294  
295  
296  
297  
298  
299  
300  
301  
302  
303  
304  
305  
306  
307  
308  
309  
310  
311  
312  
313  
314  
315  
316  
317  
318  
319  
320  
321  
322  
323  
324  
325  
326  
327  
328  
329  
330  
331  
332  
333  
334  
335  
336  
337  
338  
339  
340  
341  
342  
343  
344  
345  
346  
347  
348  
349  
350  
351  
352  
353  
354  
355  
356  
357  
358  
359  
360  
361  
362  
363  
364  
365  
366  
367  
368  
369  
370  
371  
372  
373  
374  
375  
376  
377  
378  
379  
380  
381  
382  
383  
384  
385  
386  
387  
388  
389  
390  
391  
392  
393  
394  
395  
396  
397  
398  
399  
400  
401  
402  
403  
404  
405  
406  
407  
408  
409  
410  
411  
412  
413  
414  
415  
416  
417  
418  
419  
420  
421  
422  
423  
424  
425  
426  
427  
428  
429  
430  
431  
432  
433  
434  
435  
436  
437  
438  
439  
440  
441  
442  
443  
444  
445  
446  
447  
448  
449  
450  
451  
452  
453  
454  
455  
456  
457  
458  
459  
460  
461  
462  
463  
464  
465  
466  
467  
468  
469  
470  
471  
472  
473  
474  
475  
476  
477  
478  
479  
480  
481  
482  
483  
484  
485  
486  
487  
488  
489  
490  
491  
492  
493  
494  
495  
496  
497  
498  
499  
500  
501  
502  
503  
504  
505  
506  
507  
508  
509  
510  
511  
512  
513  
514  
515  
516  
517  
518  
519  
520  
521  
522  
523  
524  
525  
526  
527  
528  
529  
530  
531  
532  
533  
534  
535  
536  
537  
538  
539  
540  
541  
542  
543  
544  
545  
546  
547  
548  
549  
550  
551  
552  
553  
554  
555  
556  
557  
558  
559  
560  
561  
562  
563  
564  
565  
566  
567  
568  
569  
570  
571  
572  
573  
574  
575  
576  
577  
578  
579  
580  
581  
582  
583  
584  
585  
586  
587  
588  
589  
590  
591  
592  
593  
594  
595  
596  
597  
598  
599  
600  
601  
602  
603  
604  
605  
606  
607  
608  
609  
610  
611  
612  
613  
614  
615  
616  
617  
618  
619  
620  
621  
622  
623  
624  
625  
626  
627  
628  
629  
630  
631  
632  
633  
634  
635  
636  
637  
638  
639  
640  
641  
642  
643  
644  
645  
646  
647  
648  
649  
650  
651  
652  
653  
654  
655  
656  
657  
658  
659  
660  
661  
662  
663  
664  
665  
666  
667  
668  
669  
670  
671  
672  
673  
674  
675  
676  
677  
678  
679  
680  
681  
682  
683  
684  
685  
686  
687  
688  
689  
690  
691  
692  
693  
694  
695  
696  
697  
698  
699  
700  
701  
702  
703  
704  
705  
706  
707  
708  
709  
710  
711  
712  
713  
714  
715  
716  
717  
718  
719  
720  
721  
722  
723  
724  
725  
726  
727  
728  
729  
730  
731  
732  
733  
734  
735  
736  
737  
738  
739  
740  
741  
742  
743  
744  
745  
746  
747  
748  
749  
750  
751  
752  
753  
754  
755  
756  
757  
758  
759  
760  
761  
762  
763  
764  
765  
766  
767  
768  
769  
770  
771  
772  
773  
774  
775  
776  
777  
778  
779  
780  
781  
782  
783  
784  
785  
786  
787  
788  
789  
790  
791  
792  
793  
794  
795  
796  
797  
798  
799  
800  
801  
802  
803  
804  
805  
806  
807  
808  
809  
810  
811  
812  
813  
814  
815  
816  
817  
818  
819  
820  
821  
822  
823  
824  
825  
826  
827  
828  
829  
830  
831  
832  
833  
834  
835  
836  
837  
838  
839  
840  
841  
842  
843  
844  
845  
846  
847  
848  
849  
850  
851  
852  
853  
854  
855  
856  
857  
858  
859  
860  
861  
862  
863  
864  
865  
866  
867  
868  
869  
870  
871  
872  
873  
874  
875  
876  
877  
878  
879  
880  
881  
882  
883  
884  
885  
886  
887  
888  
889  
890  
891  
892  
893  
894  
895  
896  
897  
898  
899  
900  
901  
902  
903  
904  
905  
906  
907  
908  
909  
910  
911  
912  
913  
914  
915  
916  
917  
918  
919  
920  
921  
922  
923  
924  
925  
926  
927  
928  
929  
930  
931  
932  
933  
934  
935  
936  
937  
938  
939  
940  
941  
942  
943  
944  
945  
946  
947  
948  
949  
950  
951  
952  
953  
954  
955  
956  
957  
958  
959  
960  
961  
962  
963  
964  
965  
966  
967  
968  
969  
970  
971  
972  
973  
974  
975  
976  
977  
978  
979  
980  
981  
982  
983  
984  
985  
986  
987  
988  
989  
990  
991  
992  
993  
994  
995  
996  
997  
998  
999  
1000

1  
2  
3  
4  
5  
6 having type 2 diabetes, IFG and IGT, by performing the 75 g oral glucose tolerance test  
7  
8  
9 (OGTT) and the measurement of hemoglobin A1c (HbA1c), fasting plasma glucose  
10  
11  
12 (FPG), casual plasma glucose and 2-h values in the OGTT. The participants were  
13  
14  
15 diagnosed as having type 2 diabetes according to diagnostic criteria set to serum levels  
16  
17 of HbA1c  $\geq$  6.5 %, FPG  $\geq$  126 mg/dl, casual plasma glucose  $\geq$  200 mg/dl and  
18  
19  
20 2-h values in the OGTT  $\geq$  200 mg/dl.<sup>15</sup> The participants were defined as having IFG  
21  
22  
23 and IGT according to FPG levels 110 mg/dl to 125 mg/dl, or 2-h values in the OGTT of  
24  
25  
26 140 mg/dl to 199 mg/dl.<sup>15</sup> To understand the effects of daily physical activity such as  
27  
28  
29 non-exercise activity thermogenesis (NEAT)<sup>16</sup> on BNP and metabolic parameters,  
30  
31  
32 participants who were engaged in sports-like exercise and resistance training were  
33  
34  
35 excluded (exclusion criteria). Participants with heart failure and renal impairment were  
36  
37  
38 also excluded (exclusion criteria).  
39  
40  
41  
42  
43

#### 44 **Anthropometric and physiological measurements**

45  
46 Height and weight were measured using a rigid stadiometer and scales (DP-7100PW,  
47  
48 Yamato Co., Ltd, Hyogo, Japan). Waist circumference around the navel was measured  
49  
50  
51 with a metal anthropometric tape while participants are standing and breathing out. BMI  
52  
53  
54 was calculated as the body weight in kilograms divided by the height in meters squared.  
55  
56  
57  
58  
59  
60

1  
2  
3  
4  
5  
6 Blood pressure was measured with participants in a seated position using an automatic  
7  
8 sphygmomanometer (HEM-762, Omron Co., Ltd, Kyoto, Japan).  
9  
10

### 11 12 13 14 15 **Physical activity measurement** 16

17  
18 Daily physical activity was measured using a triaxial accelerometer (Active Style Pro  
19  
20 HJA-350IT, Omron Co., Ltd, Kyoto, Japan), 74 x 46 x 34 mm and 60 g including  
21  
22 batteries. Participants studied wore the accelerometer on the left side of the waist.  
23  
24 Anteroposterior, mediolateral and vertical acceleration measurements were obtained  
25  
26 during each physical activity at a rate of 32 Hz to 12-bit accuracy. Each of three signals  
27  
28 from the triaxial accelerometer was passed through a high-pass filter with a cut-off  
29  
30 frequency of 0.7 Hz to remove the gravitational acceleration component. The ratios of  
31  
32 unfiltered to filtered total acceleration (TAU/TAF) and filtered vertical and horizontal  
33  
34 acceleration (VAF/HAF) were calculated to determine the cut-off value for the  
35  
36 classification of locomotive activities and non-locomotive activities including such as  
37  
38 household and occupational activities, which resulted in almost 100% accurate  
39  
40 demarcation for daily eleven different activities.<sup>17</sup> Furthermore, metabolic equivalent  
41  
42 values (METs) determined by this triaxial accelerometer have been reported to be  
43  
44 closely correlated with METs calculated by using energy expenditure (EE) measured by  
45  
46  
47  
48  
49  
50  
51  
52  
53  
54  
55  
56  
57  
58  
59  
60

1  
2  
3  
4  
5  
6 indirect calorimetry.<sup>17 18</sup>  
7  
8

9 Participants studied wore the accelerometer on the left side of the waist for  
10 consecutive 7 days, and physical activities were recorded. Participants were requested to  
11 wear the accelerometer except under special circumstances such as sleeping, bathing  
12 and during aquatic activities. Activity data were stored on a minute-by-minute basis and  
13 were downloaded to a personal computer before analysis. We excluded days in which  
14 participants did not wear the accelerometer for more than 8 hours from the data for  
15 analysis.  
16  
17  
18  
19  
20  
21  
22  
23  
24  
25  
26  
27  
28

29 Basal metabolic rate (BMR) was estimated from multiple regression equation  
30 including age, sex, height and ideal body weight (IBW) as variables, the equation as  
31 follows:  $BMR \text{ (kcal/day)} = [(0.1283 + 0.0481 \times IBW \text{ (kg)} + 0.0234 \times \text{height (cm)} -$   
32  $0.0138 \times \text{age (year)} - 0.5473 \times \text{sex coefficient (man: 1, woman:2)}) \times 293]$ .<sup>19</sup> Total  
33 energy expenditure (TEE) was calculated by manufactured regression equation using  
34 METs assessed by the triaxial accelerometer.<sup>18</sup> Physical activity level (PAL) was  
35 calculated by the following equation.  $PAL = TEE / BMR$ .<sup>20</sup>  
36  
37  
38  
39  
40  
41  
42  
43  
44  
45  
46  
47  
48  
49  
50  
51

## 52 **Blood examination, BNP measurements**

53  
54

55 After a 12-h overnight fast, blood samples were taken from the antecubital vein and  
56  
57  
58  
59  
60



1  
2  
3  
4  
5  
6 collected into tubes. We measured FPG, HbA1c and serum insulin. FPG was measured  
7  
8  
9 using an enzymatic method (Wako Pure Chemical Industries, Osaka, Japan). Serum  
10  
11  
12 insulin and HbA1c were measured by automated enzyme-linked immunosorbent assays  
13  
14 (TOSOH, Tokyo, Japan). We used homeostasis model assessment-estimated insulin  
15  
16 resistance (HOMA-IR) as the marker for insulin resistance.<sup>21</sup> Plasma BNP (BNP 1-32)  
17  
18 levels were measured using specific immunoradiometric assay for human BNP  
19  
20 (ARCHITECT BNP-JP<sup>®</sup>, ABBOTT JAPAN Co., Ltd, Tokyo, Japan).<sup>22</sup> Imprecision  
21  
22 studies yielded within run CVs of 1.1 to 5.1% and total CVs of 2.3 to 5.3% using human  
23  
24 plasma based multi-constituent controls at concentrations of 92, 500, and 3500 ng/L.<sup>22</sup>  
25  
26  
27  
28  
29  
30  
31  
32  
33  
34

### 35 **Statistical analysis**

36  
37  
38 Data were expressed as the mean  $\pm$  standard deviation (SD). Correlations among BNP,  
39  
40 age, BMI, waist circumference, blood pressure, FPG, HbA1c, serum insulin levels,  
41  
42 HOMA-IR and PAL were assessed by using the Spearman's rank correlation coefficient.  
43  
44 Multiple regression analysis was performed to test the independent correlation of PAL  
45  
46 with plasma BNP levels. We divided participants into high-BNP group ( $\geq 8.0$  pg/ml)  
47  
48 and low-BNP group ( $< 8.0$  pg/ml) by the median values of BNP. Differences in serum  
49  
50 insulin levels, HOMA-IR and PAL between high-BNP group and low-BNP group were  
51  
52  
53  
54  
55  
56  
57  
58  
59  
60

analyzed by the Mann-Whitney U test. The statistical analyses were performed by using SPSS version 19 (IBM Co., Ltd, Chicago, USA). P value <0.05 was considered to be statistically significant.

## RESULTS

We recruited 60 participants (28 men and 32 women) by the inclusion and exclusion criteria for participation in this study. **Table 1** presents the clinical characteristics of studied participants. Thirty one participants were diagnosed as having type 2 diabetes, 14 participants were with IFG and 15 participants were with IGT. The range of age in participants studied was 27-74 years old.

**Table 1** Clinical and biochemical characteristics of subjects

|                                |              |
|--------------------------------|--------------|
| n                              | 60           |
| Age (years)                    | 54.7 ± 12.2  |
| Height (cm)                    | 161.3 ± 8.9  |
| Weight (kg)                    | 69.2 ± 16.1  |
| BMI (kg/m <sup>2</sup> )       | 26.5 ± 5.1   |
| Waist circumference (cm)       | 92.4 ± 13.1  |
| Systolic blood pressure (mmHg) | 128.8 ± 17.6 |

|    |                                 |              |
|----|---------------------------------|--------------|
| 1  |                                 |              |
| 2  |                                 |              |
| 3  |                                 |              |
| 4  |                                 |              |
| 5  |                                 |              |
| 6  | Diastolic blood pressure (mmHg) | 80.5 ± 12.5  |
| 7  |                                 |              |
| 8  |                                 |              |
| 9  | Fasting plasma glucose (mg/dl)  | 122.9 ± 25.6 |
| 10 |                                 |              |
| 11 |                                 |              |
| 12 | HbA1c (%)                       | 6.7 ± 1.1    |
| 13 |                                 |              |
| 14 |                                 |              |
| 15 | BNP (pg/ml)                     | 14.0 ± 14.6  |
| 16 |                                 |              |
| 17 |                                 |              |
| 18 | Serum insulin (μU/ml)           | 9.6 ± 6.9    |
| 19 |                                 |              |
| 20 |                                 |              |
| 21 | HOMA-IR                         | 3.02 ± 2.62  |
| 22 | <hr/>                           |              |

23  
24 Data are expressed as the mean ± SD. BMI, body mass index; BNP, B-type  
25  
26 natriuretic peptide; HOMA-IR, homeostasis model assessment-estimated  
27  
28 insulin resistance.  
29

30  
31  
32 PAL evaluated by a triaxial accelerometer was significantly and positively  
33  
34 correlated with plasma BNP levels ( $r=0.296$ ,  $p=0.021$ ; **Figure 1**). Age was correlated  
35  
36 with BMI ( $r=-0.431$ ,  $p<0.001$ ), but not correlated with PAL ( $r=0.096$ ,  $p=0.462$ ). BMI  
37  
38 was not correlated with PAL ( $r=-0.11$ ,  $p=0.4$ ). The values of PAL showed a normal  
39  
40 distribution ( $p=0.453$  by Shapiro-Wilk test), however, plasma BNP levels showed  
41  
42 non-normal distribution ( $p<0.001$ ). Multivariate logistic regression was used after  
43  
44 controlling simultaneously for potential confounders. Variables considered in the  
45  
46 models were age (continuous) and BMI (continuous). To adjust the correlation between  
47  
48 PAL and plasma BNP by age and BMI, plasma BNP values were logarithmically  
49  
50  
51  
52  
53  
54  
55  
56  
57  
58  
59  
60

transformed. PAL was still significantly correlated with log plasma BNP levels after adjustment for age ( $\beta=0.290$ ,  $p=0.014$ ), and adjustment for age and BMI ( $\beta=0.282$ ,  $p=0.018$ ).

**Table 2** shows the correlations of plasma BNP levels to clinical and metabolic parameters in participants.

**Table 2** Correlations of plasma BNP levels to clinical and metabolic parameters

|                                 | correlation coefficient | <i>P</i> Value |
|---------------------------------|-------------------------|----------------|
| Age (years)                     | 0.441                   | <0.001         |
| BMI (kg/m <sup>2</sup> )        | -0.256                  | 0.048          |
| Waist circumference (cm)        | -0.279                  | 0.031          |
| Systolic blood pressure (mmHg)  | 0.175                   | 0.185          |
| Diastolic blood pressure (mmHg) | -0.070                  | 0.598          |
| Fasting plasma glucose (mg/dl)  | -0.237                  | 0.068          |
| HbA1c (%)                       | 0.050                   | 0.705          |
| Serum insulin ( $\mu$ U/ml)     | -0.350                  | 0.006          |

1  
2  
3  
4  
5  
6 HOMA-IR -0.363 0.004  
7  
8

---

9 BMI, body mass index; BNP, B-type natriuretic peptide; HOMA-IR, homeostasis model  
10 assessment-estimated insulin resistance. A statistical analysis was performed by the  
11 Spearman's rank correlation coefficient.  
12  
13  
14  
15  
16  
17  
18  
19

20  
21 There were no significant correlations of plasma BNP levels with systolic and  
22 diastolic blood pressure, FPG and HbA1c. Plasma BNP levels were significantly and  
23 inversely correlated with BMI, waist circumference, serum insulin levels and  
24 HOMA-IR, and were positively correlated with age. Significant correlations of plasma  
25 BNP levels with serum insulin ( $\beta=-0.204$ ,  $p=0.119$ ) and HOMA-IR ( $\beta=-0.271$ ,  
26  $p=0.129$ ) were lost after adjusting for PAL.  
27  
28  
29  
30  
31  
32  
33  
34  
35  
36  
37

38 To further understand the associations of plasma BNP levels with insulin  
39 resistance, we examined the differences in serum insulin levels and HOMA-IR between  
40 high-BNP group and low-BNP group (**Figure 2**). Serum insulin levels (mean  $\pm$  SD,  $8.1$   
41  $\pm 6.4$  U/ml) in high-BNP group were significantly lower than those ( $11.2 \pm 7.4$  U/ml) in  
42 low-BNP group. HOMA-IR ( $2.4 \pm 1.9$ ) in high-BNP group were also significantly lower  
43 than those ( $3.7 \pm 3.0$ ) in low-BNP group. We also analyzed the relationship between  
44 quartiles of plasma BNP versus serum insulin and HOMA-IR (**Figure 3**). We found a  
45  
46  
47  
48  
49  
50  
51  
52  
53  
54  
55  
56  
57  
58  
59  
60

1  
2  
3  
4  
5  
6 significant influence of plasma BNP on both serum insulin ( $p=0.018$  by the  
7  
8 Kruskal-Wallis ANOVA) and HOMA-IR ( $p=0.018$ ). Serum insulin level in the highest  
9  
10 plasma BNP quartile was significantly lower than in the lowest plasma BNP quartile.  
11  
12  
13 HOMA-IR in the highest plasma BNP quartile was also significantly lower than in the  
14  
15  
16 lowest plasma BNP quartile.  
17  
18  
19

20  
21 The mean  $\pm$  SD of plasma BNP levels in patients with type 2 diabetes (13 men  
22  
23 and 18 women), IFG (5 men and 9 women) and IGT (10 men and 5 women) were  $14.3$   
24  
25  $\pm 13.5$  pg/ml,  $12.9 \pm 17.2$  pg/ml and  $14.5 \pm 15.1$  pg/ml, respectively. The mean  $\pm$  SD of  
26  
27  
28 PAL in patients with type 2 diabetes, IFG and IGT were  $1.66 \pm 0.22$ ,  $1.65 \pm 0.15$  and  
29  
30  
31  $1.66 \pm 0.20$ , respectively. There were no significant differences in plasma BNP levels  
32  
33  
34 and PAL among patients with type 2 diabetes, IFG and IGT.  
35  
36  
37  
38  
39

## 40 41 **DISCUSSION**

42  
43 Recent cross-sectional studies reported that plasma BNP or NT-proBNP levels were  
44  
45  
46 inversely associated with visceral fat,<sup>23</sup> BMI, waist circumference and serum insulin  
47  
48  
49 levels.<sup>9 10</sup> However, the effect of daily physical activity on plasma BNP levels remains  
50  
51  
52 unknown. Previous cross-sectional studies have not ever been performed by using  
53  
54  
55 individuals with glucose intolerance as our study participants. In the present study, we  
56  
57  
58  
59  
60

1  
2  
3  
4  
5  
6 examined the correlation of daily physical activity measured objectively by a triaxial  
7  
8 accelerometer with plasma BNP levels, in patients with prediabetes and early untreated  
9  
10 type 2 diabetes.  
11  
12

13  
14 Present study demonstrates a significant and positive association between daily  
15  
16 physical activity and plasma BNP levels, and also an inverse association of plasma BNP  
17  
18 levels with BMI, waist circumference, serum insulin levels and HOMA-IR. Previous  
19  
20 studies reported that exercise such as bicycle and hand-grip exercise acutely increase  
21  
22 plasma BNP levels with exercise intensity in healthy individuals.<sup>13 14</sup> However, the  
23  
24 effect of daily physical activity on plasma BNP levels remains unknown. It is  
25  
26 noteworthy that we could observe a significant effect of low-intensity daily physical  
27  
28 activity, including walking, dishing and washing clothes, defined as NEAT,<sup>15</sup> on plasma  
29  
30 BNP levels. Chainani-Wu N, et al. previously conducted a nested prospective cohort  
31  
32 study of a lifestyle intervention, to understand the effects of lifestyle on BNP. They  
33  
34 observed the change in BNP for 3 months was significantly associated with the change  
35  
36 in exercise score, even after controlling the percentage of change in BMI, which agreed  
37  
38 with a significant and positive correlation between PAL and plasma BNP levels after  
39  
40 adjustment by age and BMI in our study. At 3 months in their study, they found an  
41  
42 inverse association of the change in BNP with the changes in BMI and insulin,<sup>24</sup>  
43  
44  
45  
46  
47  
48  
49  
50  
51  
52  
53  
54  
55  
56  
57  
58  
59  
60

1  
2  
3  
4  
5  
6 suggesting a significant association between BNP and insulin resistance.  
7

8  
9 An inverse association between natriuretic peptide and obesity and/or insulin  
10 resistance has been established.<sup>8-10 23 25 26</sup> However, controversy exists as to this  
11 association. Lower natriuretic peptide levels in obese individuals has been reported to  
12 be due to increased clearance by the natriuretic peptide receptors (NPR)-C abundantly  
13 expressed in adipose tissue, and also due to decreased natriuretic peptide release from  
14 the heart.<sup>27-29</sup> BNP binds to NPR on adipose tissue and stimulate lipolysis,<sup>30</sup> regulates  
15 adipose tissue by activation of proliferator-activated receptor gamma (PPAR $\gamma$ ) gene  
16 expression<sup>31</sup> and increases adiponectin secretion,<sup>32</sup> which improves insulin resistance.  
17  
18  
19  
20  
21  
22  
23  
24  
25  
26  
27  
28  
29  
30  
31

32 Evidences for the association of glucose intolerance with BNP are very limited. A  
33 previous study reported that diabetes was significantly associated with low plasma BNP  
34 levels (adjusted OR 1.51 (1.00 to 2.27) for men; adjusted OR 1.95 (1.26 to 3.02) for  
35 women).<sup>8</sup> However, the underlying mechanisms for low BNP levels in patients with  
36 impaired glucose metabolism remain unknown. In present study, PAL was positively  
37 correlated with plasma BNP levels, which was inversely correlated with the marker for  
38 insulin resistance. Furthermore, serum insulin levels and HOMA-IR were significantly  
39 lower in high-BNP group as compared with those in low-BNP group. BMI and waist  
40 circumference were also correlated with plasma BNP levels. Increased PAL may be  
41  
42  
43  
44  
45  
46  
47  
48  
49  
50  
51  
52  
53  
54  
55  
56  
57  
58  
59  
60



1  
2  
3  
4  
5  
6 associated with reduction of BMI and waist circumference, which improves insulin  
7  
8  
9 resistance and induce elevation of plasma BNP, due to decreased clearance by NPR-C  
10  
11  
12 abundantly expressed in adipose tissue. Otherwise, increased plasma BNP may  
13  
14  
15 ameliorate insulin resistance through various mechanisms, such as reduced oxidative  
16  
17  
18 stress,<sup>33</sup> decreased systemic inflammation,<sup>34</sup> stimulated lipolysis,<sup>30</sup> activation of PPAR $\gamma$   
19  
20  
21 gene expression and increased adiponectin secretion.<sup>31 32</sup> Recently, increased plasma  
22  
23  
24 BNP levels and/or biological activity could also improve insulin resistance by  
25  
26  
27 increasing mitochondrial fat oxidative capacity in white and brown fat, as well as in  
28  
29  
30 skeletal muscle.<sup>35 36</sup> However, the cardiac ejection fraction is also inversely related  
31  
32  
33 with plasma BNP levels but is not beneficial,<sup>2-7</sup> and plasma BNP levels are reported to  
34  
35  
36 increase lipolysis,<sup>37</sup> and to be positively associated insulin resistance.<sup>38</sup> The  
37  
38  
39 relationships among PAL, BNP and insulin resistance in impaired glucose metabolism  
40  
41  
42 remain largely unknown. We should perform further studies, preferably using a greater  
43  
44  
45 number of patients with glucose intolerance.

46  
47  
48 There are several limitations that need to be considered when interpreting the  
49  
50  
51 results of this study. This is a cross-sectional study, limiting inferences of causality and  
52  
53  
54 its direction. Although we controlled for some confounding factors (age, sex, BMI,  
55  
56  
57 engagement in sports-like exercise or resistance training, and medication), other factors

1  
2  
3  
4  
5  
6 such as genetic variation were not taken into account. Furthermore, we studied only  
7  
8  
9 patients with IFG, IGT and type 2 diabetes, therefore, our conclusions cannot apply to  
10  
11  
12 healthy populations. A heterogeneous group of individuals with IFG, IGT and type 2  
13  
14  
15 diabetes was examined. We could not mention that the associations between BNP and  
16  
17  
18 physical activity or insulin resistance were the same in three groups. We will study these  
19  
20  
21 associations, by using a great number of patients with each type of glucose intolerance,  
22  
23  
24 in the future. The triaxial accelerometer is an extensively validated device for evaluating  
25  
26  
27 physical activity under free living conditions,<sup>39-41</sup> however, Leenders et al indicated that  
28  
29  
30 the predictive equations based on the relationship between acceleration and energy  
31  
32  
33 expenditure (EE) during locomotive movements led to under- and overestimation of  
34  
35  
36 TEE.<sup>42</sup> It is possible that EE and PAL assessed by a triaxial accelerometer differ from  
37  
38  
39 the true amounts of EE and PAL.

40  
41 In conclusion, we found a significant and positive association between PAL and  
42  
43  
44 plasma BNP levels in patients with prediabetes and early untreated type 2 diabetes.  
45  
46  
47 Plasma BNP levels were inversely associated with insulin resistance. Our findings  
48  
49  
50 propose the possibility that BNP could be increased by daily physical activity and  
51  
52  
53 plasma BNP is beneficially associated with insulin resistance.  
54  
55  
56  
57  
58  
59  
60

### **Contributors**

The study was carried out in collaboration between all authors. HH, HY and OE conceived and designed the study. HH and MN performed the study. HH, HY and MK analyzed the data, interpreted the results and wrote the manuscript. HH and HY also discussed analyses, interpretation, presentation and participated in drafting the manuscript.

### **Funding**

This study was supported by a grant from the National Center for Global Health and Medicine (25-203).

### **Competing interests**

The authors declare that there are no conflicts of interest.

### **Ethics approval**

The study was approved by the Medical Ethics Committee of National Center for Global Health and Medicine (reference number NCGM-G-001212).

### Provenance and peer review

Not commissioned; externally peer reviewed.

### Data sharing statement

No additional data are available.

### REFERENCES

1. Gardner DG, Chen S, Glenn DJ, Grigsby CL. Molecular biology of the natriuretic peptide system: implications for physiology and hypertension. *Hypertension* 2007;49:419-26.
2. Maeda K, Tsutamoto T, Wada A, et al. High levels of plasma brain natriuretic peptide and interleukin-6 after optimized treatment for heart failure are independent risk factors for morbidity and mortality in patients with congestive heart failure. *J Am Coll Cardiol* 2000;36:1587-93.
3. Wang TJ, Larson MG, Levy D, et al. Plasma natriuretic peptide levels and the risk of cardiovascular events and death. *N Engl J Med* 2004;350:655-63.
4. Alehagen U, Lindstedt G, Levin LA, Dahlström U. Risk of cardiovascular death in elderly patients with possible heart failure. B-type natriuretic peptide (BNP) and the

1  
2  
3  
4  
5  
6 aminoterminal fragment of ProBNP (N-terminal proBNP) as prognostic indicators in a  
7  
8  
9 6-year follow-up of a primary care population. *Int J Cardiol* 2005;100:125-33.

10  
11  
12 5. Kroon MH, van den Hurk K, Alsema M, et al. Prospective associations of B-type  
13  
14 natriuretic peptide with markers of left ventricular function in individuals with and  
15  
16 without type 2 diabetes: an 8-year follow-up of the Hoorn Study. *Diabetes Care*  
17  
18 2012;35:2510-14.  
19  
20  
21

22  
23  
24 6. Olsen MH, Wachtell K, Tuxen C, et al. N-terminal pro-brain natriuretic peptide  
25  
26 predicts cardiovascular events in patients with hypertension and left ventricular  
27  
28 hypertrophy: a LIFE study. *J Hypertens* 2004;22:1597-604.  
29  
30  
31

32  
33 7. Schirmer H, Omland T. Circulating N-terminal pro-atrial natriuretic peptide is an  
34  
35 independent predictor of left ventricular hypertrophy in the general population. The  
36  
37 Tromsø Study. *Eur Heart J* 1999;20:755-63.  
38  
39  
40

41  
42 8. Wang TJ, Larson MG, Levy D, et al. Impact of obesity on plasma natriuretic peptide  
43  
44 levels. *Circulation* 2004;109:594-600.  
45  
46

47  
48 9. Koizumi M, Watanabe H, Kaneko Y, et al. Impact of obesity on plasma B-type  
49  
50 natriuretic peptide levels in Japanese community-based subjects. *Heart Vessels* 2012;  
51  
52 27:287-294.  
53  
54

55  
56 10. Olsen MH, Hansen TW, Christensen MK, et al. N-terminal pro brain natriuretic  
57  
58  
59  
60

1  
2  
3  
4  
5  
6 peptide is inversely related to metabolic cardiovascular risk factors and the metabolic  
7  
8  
9 syndrome. *Hypertension* 2005, 46:660-6.

10  
11 11. Hamilton MT, Hamilton DG, Zderic TW. Role of low energy expenditure and sitting  
12  
13 in obesity, metabolic syndrome, type 2 diabetes, and cardiovascular disease. *Diabetes*  
14  
15 2007;56:2655-67.

16  
17  
18 12. Avery L, Flynn D, van Wersch A, Sniehotta FF, Trenell MI. Changing physical  
19  
20 activity behavior in type 2 diabetes: a systematic review and meta-analysis of behavioral  
21  
22 interventions. *Diabetes Care* 2012;35:2681-89.

23  
24  
25 13. Barletta G, Stefani L, Del Bene R, et al. Effects of exercise on natriuretic peptides  
26  
27 and cardiac function in man. *Int J Cardiol* 1998;65:217-25.

28  
29  
30 14. Nielsen HB, De Palo EF, Meneghetti M, Madsen PL, Ihlemann N, Secher NH.  
31  
32 Circulating immunoreactive proANP1-30 and proANP31-67 responses to acute exercise.  
33  
34 *Regul Pept* 2001;99:203-7.

35  
36  
37 15. American Diabetes Association. Diagnosis and classification of diabetes mellitus.  
38  
39  
40  
41  
42 *Diabetes Care* 2010;33:S62-9.

43  
44  
45 16. Levine JA. Non-exercise activity thermogenesis (NEAT). *Nutr Rev* 2004;62:S82-97.

46  
47  
48 17. Oshima Y, Kawaguchi K, Tanaka S, et al. Classifying household and locomotive  
49  
50 activities using a triaxial accelerometer. *Gait Posture* 2010;31:370-4.

- 1  
2  
3  
4  
5  
6 18. Ohkawara K, Oshima Y, Hikihara Y, Ishikawa-Takata K, Tabata I, Tanaka S.  
7  
8  
9 Real-time estimation of daily physical activity intensity by a triaxial accelerometer and  
10  
11 a gravity-removal classification algorithm. *Br J Nutr* 2011;105:1681-91.  
12  
13  
14 19. Ganpule AA, Tanaka S, Ishikawa-Takata K, Tabata I. Interindividual variability in  
15  
16 sleeping metabolic rate in Japanese subjects. *Eur J Clin Nutr* 2007;61:1256-61.  
17  
18  
19 20. Energy and protein requirements. Report of a joint FAO/WHO/UNU Expert  
20  
21 Consultation. *World Health Organ Tech Rep Ser* 1985;724:1-206.  
22  
23  
24 21. Matthews DR, Hosker JP, Rudenski AS, Naylor BA, Treacher DF, Turner RC.  
25  
26 Homeostasis model assessment: insulin resistance and beta-cell function from fasting  
27  
28 plasma glucose and insulin concentrations in man. *Diabetologia* 1985;28:412-419.  
29  
30  
31 22. Mongia SK, La'ulu SL, Apple FS, Ler R, Murakami MM, Roberts WL. Performance  
32  
33 characteristics of the Architect brain natriuretic peptide (BNP) assay: a two site study.  
34  
35  
36  
37  
38  
39  
40  
41  
42  
43  
44 23. Neeland IJ, Winders BR, Ayers CR, et al. Higher natriuretic peptide levels associate  
45  
46 with a favorable adipose tissue distribution profile. *J Am Coll Cardiol* 2013;62:752-60.  
47  
48  
49 24. Chainani-Wu N, Weidner G, Purnell DM, et al. Relation of B-type natriuretic  
50  
51 peptide levels to body mass index after comprehensive lifestyle changes. *Am J Cardiol*  
52  
53  
54  
55  
56  
57  
58  
59  
60

- 1  
2  
3  
4  
5  
6 25. Mehra MR, Uber PA, Park MH, et al. Obesity and suppressed B-type natriuretic  
7  
8 peptide levels in heart failure. *J Am Coll Cardiol* 2004;43:1590-5.  
9  
10  
11 26. McCord J, Mundy BJ, Hudson MP, et al. Relationship between obesity and B-type  
12  
13 natriuretic peptide levels. *Arch Intern Med* 2004;164:2247-52.  
14  
15  
16 27. Dessì-Fulgheri P, Sarzani R, Tamburrini P, et al. Plasma atrial natriuretic peptide and  
17  
18 natriuretic peptide receptor gene expression in adipose tissue of normotensive and  
19  
20 hypertensive obese patients. *J Hypertens* 1997;15:1695-9.  
21  
22  
23 28. Das SR, Drazner MH, Dries DL, et al. Impact of body mass and body composition  
24  
25 on circulating levels of natriuretic peptides: results from the Dallas Heart Study.  
26  
27  
28  
29  
30  
31  
32  
33  
34  
35 29. Costello-Boerrigter LC, Burnett JC Jr. A new role for the natriuretic peptides:  
36  
37 metabolic regulators of the adipocyte. *J Am Coll Cardiol* 2009;53:2078-9.  
38  
39  
40 30. Sengenès C, Berlan M, De Glisezinski I, Lafontan M, Galitzky J. Natriuretic  
41  
42 peptides: a new lipolytic pathway in human adipocytes. *FASEB J* 2000;14:1345-51.  
43  
44  
45 31. Miyashita K, Itoh H, Tsujimoto H, et al. Natriuretic  
46  
47 peptides/cGMP/cGMP-dependent protein kinase cascades promote muscle  
48  
49 mitochondrial biogenesis and prevent obesity. *Diabetes* 2009;58:2880-92.  
50  
51  
52 32. Tsukamoto O, Fujita M, Kato M, et al. Natriuretic peptides enhance the production  
53  
54  
55  
56  
57  
58  
59  
60



1  
2  
3  
4  
5  
6 of adiponectin in human adipocytes and in patients with chronic heart failure. *J Am Coll*  
7  
8  
9 *Cardiol* 2009;53:2070-7.

10  
11 33. Rajagopalan S, Kurz S, Münzel T, et al. Angiotensin II-mediated hypertension in the  
12  
13 rat increases vascular superoxide production via membrane NADH/NADPH oxidase  
14  
15 activation. Contribution to alterations of vasomotor tone. *J Clin Invest*  
16  
17  
18 1996;97:1916-23.  
19  
20  
21

22  
23 34. Moro C, Klimcakova E, Lolmède K, et al. Atrial natriuretic peptide inhibits the  
24  
25 production of adipokines and cytokines linked to inflammation and insulin resistance in  
26  
27  
28 human subcutaneous adipose tissue. *Diabetologia* 2007;50:1038-47.  
29  
30  
31

32 35. Bordicchia M, Liu D, Amri EZ, et al. Cardiac natriuretic peptides act via p38 MAPK  
33  
34 to induce the brown fat thermogenic program in mouse and human adipocytes. *J Clin*  
35  
36  
37 *Invest* 2012;122:1022-36.  
38  
39

40 36. Engeli S, Birkenfeld AL, Badin PM, et al. Natriuretic peptides enhance the oxidative  
41  
42 capacity of human skeletal muscle. *J Clin Invest* 2012;122:4675-9.  
43  
44

45 37. Polak J, Kotrc M, Wedellova Z, et al. Lipolytic effects of B-type natriuretic peptide  
46  
47 1-32 in adipose tissue of heart failure patients compared with healthy controls. *J Am*  
48  
49  
50  
51  
52 *Coll Cardiol* 2011;58:1119-25.  
53  
54

55 38. Tekes S, Cikim AS. The association of brain natriuretic peptide and insulin  
56  
57  
58

1  
2  
3  
4  
5  
6 resistance in obesity-related hypertension. *J Hum Hypertens* 2007;21:546-50.  
7

8  
9 39. Plasqui G, Bonomi AG, Westerterp KR. Daily physical activity assessment with  
10  
11 accelerometers: new insights and validation studies. *Obes Rev* 2013;14:451-62.  
12

13  
14 40. Midorikawa T, Tanaka S, Kaneko K, et al. Evaluation of low-intensity physical  
15  
16 activity by triaxial accelerometry. *Obesity* 2007;15:3031-8.  
17

18  
19 41. Ekelund U, Sjöström M, Yngve A, et al. Physical activity assessed by activity  
20  
21 monitor and doubly labeled water in children. *Med Sci Sports Exerc* 2001;33:275-81.  
22

23  
24 42. Leenders NY, Sherman WM, Nagaraja HN. Energy expenditure estimated by  
25  
26 accelerometry and doubly labeled water: do they agree? *Med Sci Sports Exerc*  
27  
28  
29  
30  
31  
32 2006;38:2165-72.  
33

(figure legends)

**Figure 1** Correlation of physical activity level and plasma BNP levels in 60 subjects.

r indicates correlation coefficient analyzed by the Spearman's rank correlation coefficient.

**Figure 2** Serum insulin levels (A) and homeostatic model assessment-estimated insulin resistance (HOMA-IR) (B) in high-BNP group (n = 30) and low-BNP group (n = 30).

Data are mean values±SD. We divided subjects into high-BNP group ( $\geq 8.0$  pg/ml) and low-BNP group ( $< 8.0$  pg/ml) by the median values of BNP. Differences in serum insulin levels and HOMA-IR between high-BNP group and low-BNP group were analyzed by the Mann-Whitney U test.

**Figure 3** Serum insulin levels (A) and homeostatic model assessment-estimated insulin resistance (HOMA-IR) (B) in each plasma BNP quartiles. Q1 is the lowest quartile and

Q4 is the highest quartile. Boxes indicate medians and quartiles; whiskers indicate the lowest and highest values. We found a significant influence of plasma BNP on both serum insulin (p=0.018 by the Kruskal-Wallis ANOVA) and HOMA-IR (p=0.018). The difference between Q1 and Q2-4 was statistically analyzed by the Scheffe's F Test.

1  
2  
3  
4  
5  
6  
7  
8  
9  
10  
11  
12  
13  
14  
15  
16  
17  
18  
19  
20  
21  
22  
23  
24  
25  
26  
27  
28  
29  
30  
31  
32  
33  
34  
35  
36  
37  
38  
39  
40  
41  
42  
43  
44  
45  
46  
47  
48  
49  
50  
51  
52  
53  
54  
55  
56  
57  
58  
59  
60

For peer review only

1  
2  
3  
4  
5  
6  
7  
8  
9  
10  
11  
12  
13  
14  
15  
16  
17  
18  
19  
20  
21  
22  
23  
24  
25  
26  
27  
28  
29  
30  
31  
32  
33  
34  
35  
36  
37  
38  
39  
40  
41  
42  
43  
44  
45  
46  
47  
48  
49  
50  
51  
52  
53  
54  
55  
56  
57  
58  
59  
60



119x90mm (300 x 300 DPI)

ew only



119x90mm (300 x 300 DPI)

1  
2  
3  
4  
5  
6  
7  
8  
9  
10  
11  
12  
13  
14  
15  
16  
17  
18  
19  
20  
21  
22  
23  
24  
25  
26  
27  
28  
29  
30  
31  
32  
33  
34  
35  
36  
37  
38  
39  
40  
41  
42  
43  
44  
45  
46  
47  
48  
49  
50  
51  
52  
53  
54  
55  
56  
57  
58  
59  
60



119x90mm (300 x 300 DPI)

Review only
